1 **Group B rotavirus encodes a functional fusion-associated small**  
2 **transmembrane (FAST) protein**

3

4 Julia R. Diller<sup>a</sup>, Helen M. Parrington<sup>b</sup>, John T. Patton<sup>c†</sup>, and Kristen M. Ogden<sup>a,b#</sup>

5

6 Department of Pediatrics, Vanderbilt University Medical Center, Nashville, Tennessee,

7 USA<sup>a</sup>; Department of Pathology, Microbiology, and Immunology, Vanderbilt University

8 Medical Center, Nashville, Tennessee, USA<sup>b</sup>; Laboratory of Infectious Diseases,

9 National Institute of Allergy and Infectious Diseases, National Institutes of Health,

10 Bethesda, Maryland, USA<sup>c</sup>

11

12 Running head: Group B rotavirus encodes a FAST protein

13

14 #Address correspondence to Kristen M. Ogden, [kristen.ogden@vumc.org](mailto:kristen.ogden@vumc.org)

15

16 †Present address: John Patton, Department of Biology, Indiana University,

17 Bloomington, Indiana, USA

18

19 Abstract word count: 243

20 Text word count: 6,601

21

## 22 **ABSTRACT**

23 Rotavirus is an important cause of diarrheal disease in young mammals. Group A  
24 rotavirus (RVA) causes most human rotavirus diarrheal disease and primarily affects  
25 infants and young children. Group B rotavirus (RVB) has been associated with sporadic  
26 outbreaks of human adult diarrheal disease. RVA and RVB are predicted to encode  
27 mostly homologous proteins but differ significantly in the proteins encoded by the NSP1  
28 gene. In the case of RVB, the NSP1 gene encodes two putative protein products of  
29 unknown function, NSP1-1 and NSP1-2. We demonstrate that human RVB NSP1-1  
30 mediates syncytia formation in cultured human cells. Based on sequence alignment,  
31 NSP1-1 from groups B, G, and I contain features consistent with fusion-associated  
32 small transmembrane (FAST) proteins, which have previously been identified in other  
33 *Reoviridae* viruses. Like some other FAST proteins, RVB NSP1-1 is predicted to have  
34 an N-terminal myristoyl modification. Addition of an N-terminal FLAG peptide disrupts  
35 NSP1-1-mediated fusion, consistent with a role for this fatty-acid modification in NSP1-1  
36 function. NSP1-1 from a human RVB mediates fusion of human cells but not hamster  
37 cells and, thus, may serve as a species tropism determinant. NSP1-1 also can enhance  
38 RVA replication in human cells, both in single-cycle infection studies and during a multi-  
39 cycle time course in the presence of fetal bovine serum, which inhibits rotavirus spread.  
40 These findings suggest potential yet untested roles for NSP1-1 in RVB species tropism,  
41 immune evasion, and pathogenesis.

42

## 43 **IMPORTANCE**

44 While group A rotavirus is commonly associated with diarrheal disease in young  
45 children, group B rotavirus has caused sporadic outbreaks of adult diarrheal disease. A  
46 major genetic difference between group A and B rotaviruses is the NSP1 gene, which  
47 encodes two proteins for group B rotavirus. We demonstrate that the smaller of these  
48 proteins, NSP1-1, can mediate fusion of cultured human cells. Comparison with viral  
49 proteins of similar function provides insight into NSP1-1 domain organization and fusion  
50 mechanism. Our findings are consistent with an important role for a fatty acid  
51 modification at the amino terminus of the protein in mediating its function. NSP1-1 from  
52 a human virus mediates fusion of human cells, but not hamster cells, and enhances  
53 rotavirus replication in culture. These findings suggest potential, but currently untested,  
54 roles for NSP1-1 in RVB species tropism, immune evasion, and pathogenesis.

## 55 INTRODUCTION

56 Rotaviruses are members of the *Reoviridae* family of nonenveloped viruses with  
57 segmented dsRNA genomes and causative agents of diarrheal disease in many young  
58 mammals, including humans. Adults are often resistant to rotavirus diarrheal disease.  
59 Acquired immunity, particularly local and systemic antibodies, plays an important role in  
60 protection from rotavirus disease, and immunity appears to increase with repeated  
61 infection or immunization (1). However, innate immunity also may contribute to rotavirus  
62 disease, and rotaviruses have been shown to antagonize innate signaling pathways  
63 using multiple distinct mechanisms (1-3).

64 Rotaviruses are currently classified into eight species, A-I, which further resolve  
65 into two major clades (<https://talk.ictvonline.org/>) (4-6). One clade contains species A,  
66 C, D, and F, and the other contains species B, G, H, and I. The majority of human  
67 rotavirus diarrheal disease occurs in infants and young children and is associated with  
68 rotavirus species A (RVA) (1). RVA also causes diarrheal disease in birds and  
69 numerous mammals, though subsets of RVA genotypes are associated with specific  
70 hosts (7). RVB, RVC, RVH, and RVI have been detected mostly in domesticated  
71 mammals, while RVD, RVF, and RVG have been detected in birds. However, instances  
72 of zoonotic transmission of rotaviruses and their gene segments, particularly between  
73 humans and domesticated animals, have been documented (8, 9). Although some  
74 factors, such as lack of appropriate attachment and entry machinery or adaptive  
75 immune cross-protection, are known to impose barriers, factors permitting or limiting  
76 rotavirus zoonotic transmission remain incompletely understood.

77 Evidence of RVB infection has been commonly detected in diarrheic pigs (10-12),  
78 and RVB has been associated with sporadic outbreaks of diarrheal disease in humans  
79 (13-16). The first reported human RVB outbreak occurred in China from 1982-1983,  
80 ultimately affecting more than a million people with cholera-like diarrhea (17-21). While  
81 RVB disease symptoms resemble those of RVA gastroenteritis, RVB causes disease  
82 primarily in adults rather than pediatric populations (22). Studies suggest there is low-  
83 level RVB seroprevalence in humans (23-25). RVB outbreaks in humans are not  
84 thought to be caused by viruses directly transmitted from animals; rather, phylogenetic  
85 analysis of RVB sequences suggests viruses affecting humans and other animals are  
86 distinct (26). Factors contributing to the capacity of these viruses to cause disease in  
87 adults remain unknown.

88 Like RVA, RVB have genomes containing 11 segments of dsRNA. Based on  
89 sequence alignment and structure prediction, 10 of the 11 RVB segments encode  
90 proteins with RVA homologs (27, 28). However, the segment encoding RVA innate  
91 immune antagonist NSP1 differs significantly. For most rotaviruses in the clade  
92 containing RVB, including RVG and RVI, the NSP1 gene segment contains two  
93 overlapping ORFs whose encoded protein products have little predicted sequence or  
94 structural homology with known proteins (29). The first RVB ORF, NSP1-1, is predicted  
95 to encode a product approximately 100 amino acids in length (Fig. 1A), though the  
96 protein product has not been shown to be expressed. The length and predicted  
97 structural features of NSP1-1 are reminiscent of fusion-associated small  
98 transmembrane (FAST) proteins.

99 FAST proteins are a family of small, bitopic plasma membrane proteins that  
100 mediate cell-cell fusion and syncytium formation (reviewed in (30, 31)). These  
101 nonstructural viral proteins are encoded by fusogenic members of the *Aquareovirus* and  
102 *Orthoreovirus* genera of the nonenveloped *Reoviridae* virus family. There are multiple  
103 types of FAST proteins, and they range in size from approximately 90-200 amino acids.  
104 Each contains three modular domains: a small, N-terminal extracellular domain that is  
105 often acylated, a transmembrane domain, and a C-terminal cytoplasmic tail containing a  
106 polybasic motif. Additional putative functional motifs have been identified and vary  
107 among FAST protein family members. FAST proteins are nonstructural proteins that are  
108 expressed following virus entry, viral mRNA transcription, and translation. Membrane  
109 fusion occurs in closely apposed cells. FAST protein clustering and interactions with the  
110 opposing lipid bilayer, including insertion of fatty acid moieties or hydrophobic residues,  
111 favors lipid mixing and membrane curvature, leading to pore formation. Following pore  
112 formation, cellular proteins, including annexin 1 and actin promote pore expansion and,  
113 thereby, syncytia formation.

114 In the current publication, we provide evidence that RVB NSP1-1 is a FAST  
115 protein that is capable of mediating syncytia formation in some, but not all, mammalian  
116 cell types. Based on sequence alignment, we suggest that other rotavirus species, RVG  
117 and RVI, also may encode functional FAST proteins. We demonstrate that the N  
118 terminus is required for NSP1-1-mediated fusion and provide experimental support for a  
119 role of NSP1-1 in viral replication and spread. These findings have potential implications  
120 for the role of NSP1-1 in host immune evasion and human RVB disease.

121

## 122 **RESULTS**

123 **The N terminus is required for RVB NSP1-1-mediated fusion in 293T cells.** To test  
124 the hypothesis that NSP1-1 is a FAST protein, we transfected human embryonic kidney  
125 293T cells with a pCAGGS vector, pCAGGS encoding the fusogenic Nelson Bay  
126 orthoreovirus (NBV) p10 FAST protein (32), or pCAGGS encoding codon-optimized  
127 human RVB Bang117 NSP1-1, permitted expression for 24 h, then examined cell  
128 morphology using differential interference contrast microscopy. Transfection with NBV  
129 p10, a known FAST protein (32-35), or with RVB NSP1-1 changed the cell morphology  
130 from individually distinct cells to a monolayer pockmarked by smooth oval-shaped  
131 regions lacking defined cell edges, which likely represent syncytia (Fig. 1B). These  
132 observations suggest that, like NBV p10, RVB NSP1-1 can mediate cell-cell fusion.

133 To enable detection of RVB NSP1-1, we engineered a FLAG peptide at the N or  
134 C terminus. Following transfection of 293T cells with pCAGGS encoding tagged forms  
135 of RVB NSP1-1, we found that C-terminally tagged NSP1-1 (NSP1-1-FLAG) mediated  
136 morphological changes resembling syncytia in the cell monolayer (Fig. 1B). Cells  
137 transfected with plasmids encoding N-terminally tagged NSP1-1 (FLAG-NSP1-1),  
138 however, were morphologically indistinguishable from vector-transfected cells. This  
139 finding suggests that the N terminus plays an important role in RVB NSP1-1-mediated  
140 cell morphological changes.

141 To gain insight into RVB NSP1-1 localization and cell morphological changes, we  
142 transfected 293T cells with pCAGGS encoding FLAG tagged NSP1-1, waited 24 h to  
143 permit protein expression, fixed and stained the cells to detect FLAG and nuclei, and  
144 imaged them using confocal microscopy. FLAG-NSP1-1 was typically expressed in the

145 cytoplasm of individual, or sometimes adjacent, cells (Fig. 2A). In Z-stacks, FLAG-  
146 NSP1-1 was detected in the cytoplasm at the level of the nucleus, and individual stained  
147 cells were distinct (Fig. 2C). In striking contrast to FLAG-NSP1-1, NSP1-1-FLAG was  
148 detected in clusters containing many nuclei (Fig. 2B). When looking through a Z-stack,  
149 NSP1-1-FLAG was detected at and above the level of the nucleus, consistent with  
150 cellular and plasma membrane localization, and the edges of individual stained cells  
151 were indistinguishable (Fig. 2D).

152

153 **Shared features of RVB NSP1-1 and *Reoviridae* FAST proteins.** The similarity in  
154 protein size and cell morphological changes induced upon RVB NSP1-1 expression  
155 suggested that it may be a FAST protein. To gain insight into the relationships between  
156 rotavirus NSP1-1 proteins and *Reoviridae* FAST proteins, we constructed a maximum  
157 likelihood (ML) tree using the sequences of representative RVB, RVG, and RVI NSP1-1  
158 proteins and orthoreovirus and aquareovirus FAST proteins (Fig. 3A). We found that  
159 aquareovirus, and ARV/NBV FAST proteins each formed a clade supported by strong  
160 bootstrap values that clustered distinctly from the rotavirus NSP1-1 proteins and BRV  
161 p15, BroV p13, and RRV p14 FAST proteins. While they did not cluster together  
162 strongly, RVB and RVG NSP1-1 proteins clustered most closely with BRV p15, whereas  
163 RVI NSP1-1 proteins clustered more closely with RRV p14.

164 To gain insight into sequence and structural features of rotavirus NSP1-1  
165 proteins, we used software to scan for sequence motifs and constructed amino acid  
166 alignments with the most closely clustering FAST proteins from the ML tree (Fig. 3A).  
167 Based on the PROSITE definition (PDOC00008), an N-myristoylation site was predicted



168 at amino acids 2-7 in RVB NSP1-1 (Fig. 3B). Although there is a high false-positive  
169 prediction rate for N-myristoylation motifs, prediction at this precise location for every  
170 complete RVB, RVG, and RVI NSP1-1 sequence deposited in GenBank (as of  
171 12/4/2018; Fig. S1) provides confidence in its legitimacy. BroV, RRV, and BRV FAST  
172 proteins are also known or predicted to be N-myristoylated (36-39). Using the TMHMM  
173 Server, we identified predicted transmembrane helices in RVB, RVG, and RVI  
174 sequences (Fig. 3B). In each case, the N terminus was predicted to be extracellular,  
175 while the C terminus was predicted to be cytoplasmic. For RVB Bang117 NSP1-1, the  
176 TM region was predicted to span amino acids 39-61. The N termini of the NSP1-1  
177 proteins in the alignment were typically predicted to be shorter than those of the FAST  
178 proteins. Like the BroV, RRV, and BRV FAST proteins, each of the NSP1-1 proteins  
179 contained multiple basic residues shortly after the TM domain (Fig. 3B). However, fewer  
180 basic residues were present in NSP1-1 (4-5) than FAST (6-7) protein polybasic regions.  
181 Some RVB sequences contain short stretches of hydrophobic residues in the N-terminal  
182 domain, while others contain two short hydrophobic regions in the C-terminal domain  
183 (Fig. 3B). Analyzed RVG and RVI NSP1-1 proteins lacked strong hydrophobic  
184 signatures outside of the predicted transmembrane domain. NSP1-1 proteins were  
185 typically shorter than FAST proteins, by up to 36 amino acids, with most of the  
186 difference in length residing C terminal to the polybasic region (Fig. 3B). The motifs  
187 identified by sequence alignment and analysis (Fig. 3B) suggest models of RVB NSP1-  
188 1 in which the extracellular, myristoylated N-terminal domain precedes a single  
189 transmembrane domain and a short cytoplasmic tail containing a polybasic region, with  
190 some RVB NSP1 proteins containing a single hydrophobic region N-terminal to the

191 transmembrane domain and others containing two hydrophobic regions C-terminal to  
192 the polybasic region (Fig. 3C).  
193  
194 **RVB NSP1-1 mediates syncytia formation in Caco-2 cells.** Rotaviruses infect  
195 enterocytes in the human intestine. To determine whether RVB Bang117 NSP1-1 could  
196 mediate syncytia formation in a more biologically relevant cell type, we transfected  
197 human epithelial colorectal adenocarcinoma Caco-2 cells with pCAGGS encoding  
198 FLAG-tagged RVB NSP1-1. These cells can form polarized monolayers and  
199 morphologically and functionally resemble the enterocytes lining the small intestine. To  
200 achieve reasonable transfection efficiency, we transfected subconfluent Caco-2  
201 monolayers, waited 24 or 48 h to permit protein expression, fixed and stained the cells  
202 to detect FLAG and nuclei, then imaged them using indirect immunofluorescence  
203 microscopy. Similar to observations made in 293T cells (Fig. 2A), we found that FLAG-  
204 NSP1-1 was primarily expressed in the cytoplasm of individual Caco-2 cells or small  
205 numbers of adjacent cells, whereas NSP1-1-FLAG was expressed mostly in the  
206 cytoplasm of clusters of cells containing multiple nuclei and lacking distinct cell  
207 boundaries (Fig. 4A). We quantified the numbers of single cells and clusters (at least  
208 three immediately adjacent FLAG-positive cells) present in wells of transfected Caco-2  
209 cells at 24 h post transfection. Consistent with a role for the N terminus in cell-cell  
210 fusion, we found that there were significantly more FLAG-positive single cells in FLAG-  
211 NSP1-1-transfected than NSP1-1-FLAG-transfected wells (~9 fold) and significantly  
212 more clusters present in NSP1-1-FLAG-transfected cells than FLAG-NSP1-1-  
213 transfected wells (~3.5 fold) (Fig. 4B). Often, groups of FLAG-NSP1-1-transfected cells

214 we identified as “clusters” appeared to be groups of three or four adjacent singly  
215 transfected cells. To quantify differences in cluster size between FLAG-NSP1-1-  
216 transfected and NSP1-1-transfected Caco-2, we measured cluster diameters and found  
217 that diameters of NSP1-1-FLAG clusters were significantly larger than those of FLAG-  
218 NSP1-1 (Fig. 4C). These findings suggest that C-terminally tagged RVB Bang117  
219 NSP1-1 can mediate fusion of a cell type similar to that targeted during natural RVB  
220 infection.

221  
222 **RVB NSP1-1 fails to mediate fusion in BHK cells.** We next wanted to test RVB  
223 NSP1-1 function in the context of viral infection. NBV p10 enhances reovirus and  
224 rotavirus replication in baby hamster kidney cells expressing T7 RNA polymerase (BHK-  
225 T7 cells) (32). The reverse genetics system for simian rotavirus strain SA11 involves  
226 transfection of BHK-T7 cells with plasmids encoding the 11 rotavirus RNAs under the  
227 control of the T7 promoter, along with pCAGGS plasmids encoding viral capping  
228 enzymes, to enhance viral protein translation, and NBV p10, to enhance rotavirus  
229 replication and spread. We hypothesized that, if RVB NSP1-1 could mediate syncytia  
230 formation in BHK-T7 cells, it could functionally replace NBV p10 in rotavirus reverse  
231 genetics experiments. As a first step towards this goal, we transfected BHK-T7 cells  
232 with pCAGGS alone or pCAGGS expressing NBV p10, FLAG-NSP1-1, or NSP1-1-  
233 FLAG, waited 24 h to permit protein expression, fixed and stained the cells to detect  
234 FLAG and nuclei, and imaged them using differential interference contrast and indirect  
235 immunofluorescence microscopy. Transfection with pCAGGS encoding NBV p10  
236 resulted in the appearance of balls or ring-like clusters of nuclei surrounded by regions

237 of smooth cytoplasm nearly devoid of nuclei (Fig. 5B). Although many transfected cells  
238 detectably expressed NSP1-1-FLAG or FLAG-NSP1-1, no morphological differences  
239 were detected in comparison to vector-transfected cells, and all cells had distinct  
240 borders (Fig. 5A,C-D). A similar lack of morphological change was observed following  
241 transfection of BHK-T7 cells with untagged RVB NSP1-1 (not shown). Although  
242 localization was not examined in depth, NSP1-1-FLAG staining did not often diffusely fill  
243 the cytoplasm but appeared as perinuclear puncta, suggesting potential mislocalization  
244 (Fig. 5D). These findings suggest that RVB NSP1-1 is incapable of mediating cell-cell  
245 fusion in all mammalian cell lines.

246

247 **RVB NSP1-1 mediates enhanced RVA replication in human cells.** Since NSP1-1 did  
248 not mediate cell-cell fusion in BHK-T7 cells, we sought to test RVB NSP1-1 function in  
249 the context of viral infection in Caco-2 and 293T cells, which can support RVA  
250 replication and RVB NSP1-1-mediated fusion. Although the precise mechanism is  
251 unknown, NBV p10 has been shown to enhance replication of simian RVA strain SA11  
252 in cells adsorbed at low multiplicity of infection (MOI) during a 16 h time course, which is  
253 less than the time required to complete a round of replication and initiate infection of a  
254 new subset of cells (32). Trypsin, which cleaves viral attachment protein VP4, activates  
255 RVA for optimal infectivity (1). To determine whether NBV p10 or RBV NSP1-1 affected  
256 viral replication in Caco-2 or 293T cells, we transfected these cells with increasing  
257 concentrations of pCAGGS alone or pCAGGS encoding NBV p10 or RVB NSP1-1, then  
258 infected them with trypsin-activated RVA strain SA11. At 16 h post infection, we lysed  
259 the cells and quantified viral titers. We found that SA11 titer was enhanced in Caco-2

260 cells transfected with 2  $\mu$ g of NBV P10 or 1 or 2  $\mu$ g of NSP1-1, in comparison to vector-  
261 transfected cells (Fig. 6A). A very modest but statistically significant enhancement of  
262 SA11 titer also was detected in 293T cells transfected with 2 or 10 ng of pCAGGS  
263 expressing RVB NSP1-1, in comparison to vector-transfected cells (Fig. 6B). These  
264 findings suggest a potential role for RVB NSP1-1 in enhancing rotavirus replication in  
265 human cells during a single infectious cycle.

266 Rotavirus spreads poorly in cultured cells in the presence of fetal bovine serum  
267 (FBS), likely due to inhibited cleavage of the viral attachment protein. To determine  
268 whether RVB NSP1-1 could facilitate rotavirus spread in the presence of FBS, we  
269 transfected Caco-2 or 293T cells with pCAGGS alone or pCAGGS encoding NBV p10  
270 or RVB NSP1-1, then infected them with RVA strain SA11 and incubated them in  
271 standard culture medium containing 20% FBS (Caco-2) or 10% FBS (293T). At 24 h  
272 and 48 h post transfection, we lysed the cells and quantified viral titer. In Caco-2 cells,  
273 we found a modest increase in SA11 titer (<10-fold) at 24 h post infection in RVB NSP1-  
274 1 transfected cells in comparison to vector-transfected cells (Fig. 6C). No significant  
275 difference in titer was detected at 48 h post infection. However, by this time, RVB  
276 NSP1-1-transfected Caco-2 monolayers displayed evidence of significant cytopathic  
277 effects, including cell rounding and lifting, which may indicate poor cell health (Fig. 6E).  
278 In 293T cells, we found that SA11 titers were significantly enhanced for both NBV p10-  
279 and RVB NSP1-1-transfected cells, in comparison to vector-transfected cells at 24 and  
280 48 h post infection (Fig. 6D). Transfection of 293T cells with similar amounts of  
281 pCAGGS expressing RVB NSP1-1 results in modest (24 h) to significant (48 h) visible  
282 syncytium formation within the monolayer, without complete monolayer disruption and

283 cell lifting (Fig. 6E). Together, these findings suggest that RVB NSP1-1 can enhance  
284 rotavirus replication during multi-cycle infection, perhaps by enabling cell-cell spread.

285

## 286 **DISCUSSION**

287       Based on our findings, we propose that RVB encode functional FAST proteins  
288 that contain a myristoyl moiety on the N terminus, an extracellular N-terminal loop, a  
289 central transmembrane helix, and a relatively short cytoplasmic tail containing a region  
290 of approximately four basic residues (Fig. 3C). Short stretches of hydrophobic residues  
291 also are predicted in either the N- or C-terminal regions of the protein. The  
292 morphological changes induced in cultured cells following NSP1-1 expression, which  
293 include the appearance of smooth patches lacking distinct cell membranes and  
294 resemble those induced by NBV p10, suggest that RVB NSP1-1 can mediate syncytia  
295 formation in human 293T cells (Fig. 1B). The detection of FLAG-positive multinucleated  
296 clusters in NSP1-1-FLAG transfected 293T and Caco-2 cells suggests that the cells  
297 expressing NSP1-1 are fusing to one another, and addition of a peptide to the C  
298 terminus does not disrupt fusion activity (Figs. 2 and 4). The reduced number of clusters  
299 in FLAG-NSP1-1-transfected 293T and Caco-2 cells suggests that the N terminus plays  
300 an important role in fusion and is consistent with disruption of the N-terminal myristoyl  
301 moiety (Figs. 2-4). While the proposed sequence and structural features of RVB NSP1-  
302 1 remain to be biochemically and structurally validated, sequence alignment and  
303 analysis support our model of RVB NSP1-1 organization (Fig. 3). For example, the  
304 presence of a predicted myristoylation motif at the N terminus of every RVB, RVG, and

305 RVI sequence in GenBank (Figs. 3B and S1) provides support for the presence of this  
306 fatty acid modification.

307 If our model is correct, RVB NSP1-1 proteins are the shortest and simplest  
308 proteins shown to mediate functional cell-cell fusion. Conservation of a fatty acid  
309 modification at the N terminus and the polybasic motif in the cytoplasmic tail in all  
310 NSP1-1 proteins, as well as clusters of hydrophobic residues in either the N- or C-  
311 terminal domain, suggests these motifs may be critical for protein function (Figs. 3B-C  
312 and S1). The myristoylated N terminus and hydrophobic patch residues of FAST  
313 proteins induce lipid mixing between liposomal membranes (37, 40). While insertion of  
314 N-terminal fatty acid and hydrophobic moieties may promote membrane merger,  
315 cytoplasmic hydrophobic patches may promote pore formation by partitioning into the  
316 curved rim of a newly formed fusion pore (31). Sequence alignments suggest that RVG  
317 and RVI also may encode FAST proteins (Fig. 3B), though their functionality remains to  
318 be tested. It will be informative to determine whether these proteins can mediate cell-  
319 cell fusion in the absence of evident hydrophobic patches and polyproline motifs. If  
320 functional, RVI NSP1-1 will represent the smallest known FAST protein and may help  
321 define the minimal requirements for cell-cell fusion. Expansion of the repertoire of  
322 known viral FAST proteins may enable the establishment of guidelines that permit  
323 identification of additional novel viral FAST proteins, despite their highly divergent  
324 sequences.

325 Many viruses exhibit tropism for certain animal species or cell types. Zoonotic  
326 transmission, however, is a frequent but often incompletely understood phenomenon.  
327 Virus and host factors can serve as barriers to transmission or virulence factors

328 following zoonotic transmission. Based on the observation that it can mediate fusion in  
329 human cells but not hamster cells, NSP1-1 may serve as a viral tropism determinant.  
330 However, cells from many different animal species and tissue types, as well as NSP1-1  
331 proteins from rotaviruses derived from different animal hosts, will need to be tested  
332 before the boundaries of this limitation are revealed. Support for the idea that there are  
333 host species preferences comes from the observation that NSP1 gene sequences of  
334 RVBs from murine, human, ovine, bovine, and porcine hosts cluster in distinct  
335 phylogenetic groups, with low identities between them and the greatest diversity  
336 detected among porcine RVBs (26). Why NBV p10 FAST is capable of mediating fusion  
337 in BHK-T7 cells, while RVB NSP1-1 is not, currently is unclear. While RVB NSP1-1 is  
338 predicted to be myristoylated at the N terminus, p10 FAST proteins form an extracellular  
339 cysteine loop and are not myristoylated but are palmitoylated at a membrane-proximal  
340 site in the N terminus (34, 41-43). These differences in acylation may affect  
341 functionality. Based on apparent mislocalization of NSP1-1, it is possible that signals  
342 that mediate trafficking from the endoplasmic reticulum, where FAST proteins are  
343 translated, to the plasma membrane, via the secretory pathway (38, 44-47), fail to  
344 function appropriately in some non-homologous hosts. Chimeric FAST proteins  
345 containing individual domain exchanges between RVB Bang117 NSP1-1 and NBV p10,  
346 similar to those engineered by Eileen Clancy for other FAST proteins (30, 31, 48), may  
347 provide insight into protein domains responsible for the species-specific fusion activity of  
348 RVB Bang117 NSP1-1.

349       Expression of NSP1-1 during infection has not been shown. A direct attempt to  
350 detect expression of a product from the NSP1-1 ORF following *in vitro* transcription and



351 translation from full-length IDIR gene 7 and immunoprecipitation with convalescent rat  
352 serum proved unsuccessful (29). In the same publication, the authors predicted efficient  
353 NSP1-2 translation and much less efficient NSP1-1 translation based on nucleotide  
354 sequences flanking the START codons (29). However, villous epithelial syncytial cell  
355 formation has been observed in the ileum and jejunum of RVB IDIR-infected neonatal  
356 rats, with syncytial cells reported to contain large numbers of viral particles (49, 50).  
357 Additionally, an ovine RVB strain produced RVB-positive syncytia on MA104  
358 monolayers (51). In numerous studies of RVB in pigs and cows, researchers have failed  
359 to note detection of syncytia, though they may not have been looking for such events.  
360 However, in a rodent model of infection with a fusogenic pteropine orthoreovirus (PRV),  
361 authors failed to detect syncytia in infected lung tissue when specifically looking for  
362 these cells (33). In the case of RVB infection, it has been suggested that syncytia are  
363 rapidly sloughed from the intestinal epithelium and therefore easily missed (51). These  
364 observations suggest that NSP1-1 is expressed during RVB infection, but low levels of  
365 expression and cytotoxic effects may render this protein, and the syncytia whose  
366 formation it mediates, difficult to detect.

367         Our results with cells transiently transfected with plasmids expressing RVB  
368 NSP1-1 and infected with RVA SA11 suggest potential functions for NSP1-1 in rotavirus  
369 replication and spread (Fig. 6). Since only a single successful *in vitro* culture system has  
370 been published for RVB (52), with no follow-up studies, we used RVA to study NSP1-1  
371 function in the context of viral infection. Our experimental results support a role for RVB  
372 NSP1-1 in enhancing rotavirus replication in the presence of trypsin at a time point less  
373 than the length of a single infectious cycle (Fig. 6A-B) and in the presence of inhibitory

374 FBS at time points that would permit multiple rounds of replication (Fig. 6C-D). The  
375 latter result is consistent with enhancement of replication by permitting the virus to  
376 spread from cell-to-cell without having to initiate infection at the plasma membrane,  
377 whereas the former result suggests another mechanism of replication enhancement. A  
378 major drawback to our experiments using RVA is the inability to ensure that NSP1-1  
379 expression and viral infection occurred in the same cell. With a small percentage of cells  
380 infected and only a subset of cells transfected with plasmid DNA, it is likely that only a  
381 fraction of infected cells also fused to adjacent cells to mediate virus spread. In our  
382 system, we also were unable to modulate NSP1-1 expression levels, and our codon-  
383 optimized expression construct may have yielded significantly higher levels of protein  
384 expression than are likely to occur during natural infection, fusing cells too rapidly and  
385 resulting in cell death (Fig. 6E). Ultimately, these preliminary observations will need to  
386 be validated in a more biologically relevant system. Our results are consistent with  
387 those from other published studies showing that FAST proteins can enhance replication  
388 of dsRNA viruses on sub-single-cycle and multi-cycle time scales (32, 33). In one study,  
389 the authors detected enhancement of viral RNA synthesis in the presence of FAST  
390 proteins as early as five hours post infection, and they hypothesized that cell-to-cell  
391 fusion provides access to additional substrates for viral transcription, such as nucleotide  
392 triphosphates and S-adenosyl methionine (33). Since replication enhancement  
393 conferred by FAST proteins was detected even at high MOI, the authors suggested that  
394 enhancement is not mediated by cell-to-cell spread. Mechanisms by which cell fusion  
395 could enhance viral replication at high MOI remain unclear, as fusion would not be

396 anticipated to provide access to new sources of material for building progeny virions  
397 under these conditions.

398         What is the biological function of RVB NSP1-1 during infection? Syncytia formed  
399 between epithelial cells may increase rates of cell-to-cell spread and enhancing viral  
400 replication and shedding within the infected host. This hypothesis is supported by the  
401 previous detection of syncytial cells, which were reported to contain the majority of virus  
402 particles, at the tips of jejunal and ileal villi during RVB infection of neonatal rats (49,  
403 50). Close cellular apposition, mediated by adherens junctions, facilitates FAST protein-  
404 mediated fusion (53). Thus enterocytes, which form close contacts via tight junctions,  
405 are ideal candidate cells for FAST protein-mediated syncytium formation. While the  
406 hypothesis remains to be tested, our findings (Fig. 6C-D) suggest the possibility that  
407 cell-to-cell fusion induced by NSP1-1 aids in the spread of RVB strains following  
408 introduction into the gastrointestinal tract. Such a mechanism could potentially enable  
409 immune evasion within the host by permitting viral spread in the presence of  
410 neutralizing antibodies. A report of dairy cows involved in a 2002 RVB diarrhea outbreak  
411 shedding a highly similar strain of RVB during a 2005 outbreak suggests that animals  
412 are not completely protected after the initial infection (54), though RVA reinfection with  
413 reduced disease severity also occurs (1, 55). Regardless of mechanism, there is now  
414 published evidence supporting a biological role for a FAST protein *in vivo* (33). In a  
415 rodent model, two PRV viruses that are isogenic except in the capacity to express p10  
416 FAST exhibited significant differences in pathogenesis, with animals infected with PRV  
417 containing an intact FAST protein exhibiting reduced body weight and survival and  
418 enhanced viral titer and lung pathology, in comparison to animals infected with PRV

419 lacking p10 FAST expression. While we currently lack a system in which to directly test  
420 its function, these observations suggest a potential role for RVB NSP1-1 and other  
421 FAST proteins in viral replication and pathogenesis *in vivo*.

422         Although it is reasonable to anticipate that NSP1-1 permits evasion of adaptive  
423 immune responses by promoting direct rotavirus cell-to-cell spread within the host, it is  
424 unclear how RVB and other viruses in its clade (RVG, RVH, and RVI) evade innate  
425 immune signaling in the absence of an RVA NSP1 homolog. RVA NSP1 has been  
426 shown to promote degradation of innate signaling molecules, including interferon  
427 regulatory factors and  $\beta$ -TrCP (3, 56). In some cases, RVA NSP1 function is host  
428 species-specific. Perhaps cell-cell fusion permits rotavirus to evade some innate  
429 immune mechanisms, or perhaps NSP1-2, whose function remains unknown, obviates  
430 the need for an RVA-like NSP1 protein. The evolutionary mechanisms through which  
431 FAST proteins became incorporated into rotavirus genomes, or *Reoviridae* genomes in  
432 general, and consequences of the lack of an NSP1-1 ORF for RVH viruses also are  
433 unclear (57). Future studies using new animal models and technologies, such as  
434 reverse genetics and human intestinal organoid culture (32, 58), may permit insights  
435 into differences in host interactions among the rotavirus species.

436

## 437 **MATERIALS AND METHODS**

438         **Cells, viruses, and antibodies.** Human embryonic kidney 293T cells were  
439 grown in Dulbecco's modified Eagle's minimal essential medium (Corning)  
440 supplemented to contain 10% fetal bovine serum (FBS) (Gibco) and 2 mM L-glutamine.  
441 Human colonic epithelial Caco-2 cells were grown in Eagle's minimum essential

442 medium (MEM) with Earle's salts and L-glutamine (Corning) supplemented to contain  
443 20% FBS, 1X MEM non-essential amino acids (Sigma), 10 mM HEPES (Corning), and  
444 1 mM sodium pyruvate (Gibco). Monkey kidney epithelial MA104 cells were grown in  
445 MEM with Earle's salts and L-glutamine (Corning) supplemented to contain 5% FBS.  
446 Baby hamster kidney cells expressing T7 RNA polymerase under control of a  
447 cytomegalovirus promoter (BHK-T7) (59) were grown in Dulbecco's modified Eagle's  
448 minimal essential medium (Corning) supplemented to contain 5% fetal bovine serum, 2  
449 mM L-glutamine, and 10% tryptose phosphate broth (Gibco). These cells were  
450 propagated in the presence of 1 mg/ml G418 (Invitrogen) during alternate passages.

451 Simian rotavirus laboratory strain SA11 was propagated in MA104 cells, and viral  
452 titers were determined by FFA using MA104 cells (60).

453 Monoclonal mouse anti-FLAG antibody (Sigma), sheep polyclonal rotavirus  
454 antiserum (Invitrogen), Alexa Fluor 546-conjugated anti-mouse IgG (Invitrogen), and  
455 Alexa Fluor 488-conjugated anti-sheep IgG (Invitrogen) are commercially available.

456 **Plasmids.** NBV p10 in pCAGGS has been described previously (32). pLIC8 was  
457 constructed by engineering a ligation-independent cloning site in mammalian  
458 expression plasmid pGL4.74. pLIC6 was constructed by engineering a ligation-  
459 independent cloning site into mammalian expression plasmid pCAGGS. RVB Bang117  
460 was sequenced from a specimen obtained in 2002 from a 32 year-old male with severe  
461 diarrhea in Bangladesh (61). A codon-optimized version of RVB Bang117 NSP1-1 was  
462 synthesized (Genscript) and cloned into pLIC8 and pLIC6 using ligation-independent  
463 cloning following PCR amplification with appropriate primers and T4 DNA polymerase  
464 treatment. Tagged versions of NSP1-1 were engineered using 'round the horn PCR.

465 Briefly, a pair of primers, each encoding half of the FLAG peptide (DYKDDDDK), was  
466 used to amplify NSP1-1 in pLIC8. Then, the PCR fragment was purified and ligated to  
467 form a complete tag inserted at the N or C terminus of the ORF. After verifying the  
468 sequences of plasmid clones, tagged versions of NSP1-1 were transferred into pLIC6  
469 using ligation-independent cloning, and nucleotide sequences were verified by Sanger  
470 sequencing.

471 **Cell Transfection and Imaging.** For differential interference contrast imaging,  
472 293T cells ( $\sim 5 \times 10^5$  per well) in 12-well plates were transfected with 0.2  $\mu\text{g}$  of plasmid  
473 DNA per well using LyoVec transfection reagent (InvivoGen), according to manufacturer  
474 instructions, incubated at 37°C for 24 h, and imaged using a Zeiss Axiovert 200 inverted  
475 microscope. For confocal imaging, glass coverslips were sterilized, coated with poly-L-  
476 lysine (Sigma), rinsed, and dried. 293T cells ( $1.25 \times 10^5$  per well) were seeded onto  
477 coverslips in 24-well plates and incubated at 37°C one day prior to transfection with 0.1  
478  $\mu\text{g}$  of plasmid DNA per well using LyoVec. At 24 h post transfection, cells were fixed  
479 with cold methanol and blocked with PBS containing 1% FBS. FLAG peptides were  
480 detected with mouse anti-FLAG diluted 1:500, and Alexa Fluor 546-conjugated anti-  
481 mouse IgG, diluted 1:1000, and nuclei were detected using 300 nM 4',6-diamidino-2-  
482 phenylindole (DAPI, Invitrogen), with washes in PBS containing 0.5% Triton X-100  
483 (Fisher Scientific). Stained coverslips were mounted on glass slides using ProLong Gold  
484 antifade mountant (Invitrogen) and dried prior to imaging with an Olympus FV-1000  
485 Inverted confocal microscope.

486 BHK-T7 cells ( $\sim 2 \times 10^5$  per well) in 24-well plates were transfected with 0.5  $\mu\text{g}$  of  
487 plasmid DNA per well using TransIT-LT1 transfection reagent (Mirus Bio) in OptiMEM

488 (Gibco), according to manufacturer instructions, and incubated at 37°C for 24 h prior to  
489 fixing and staining. Cells were fixed with cold methanol and blocked with PBS  
490 containing 1% FBS. Staining to detect FLAG and nuclei was performed as described  
491 above. Stained cells were imaged using a Zeiss Axiovert 200 inverted microscope  
492 equipped with an HBO 100 mercury arc lamp.

493 Caco-2 cells ( $\sim 1 \times 10^5$  per well) in 24-well plates were transfected with 1  $\mu$ g per  
494 well of plasmid DNA using TransIT-LT1 transfection reagent in OptiMEM, according to  
495 manufacturer instructions, and incubated at 37°C for 24 h prior to fixing and staining.  
496 Cells were fixed with 10% neutral buffered formalin and blocked with PBS containing  
497 0.5% Triton X-100 and 5% FBS. Staining to detect FLAG and nuclei was performed as  
498 described above. Stained cells were imaged using a Zeiss Axiovert 200 inverted  
499 microscope equipped with an HBO 100 mercury arc lamp.

500 **Quantitation of single cells, clusters, and cluster diameter.** Caco-2 cells in  
501 24-well plates were transfected with 1  $\mu$ g per well of plasmids encoding RVB Bang117  
502 NSP1-1-FLAG or RVB Bang117 FLAG-NSP1-1 and stained to detect FLAG and nuclei  
503 as described for imaging studies. Clusters were defined as groupings of at least three  
504 FLAG-positive cells in contact with one another. To quantify single cells and clusters,  
505 entire wells of transfected cells were visually analyzed using a Zeiss Axiovert 200  
506 inverted microscope. The person analyzing the wells was not the person who performed  
507 the transfections and in most cases was blinded to the identity of the samples. Four  
508 independent experiments each containing three technical replicates were analyzed. To  
509 quantify cluster diameter, entire wells of transfected cells from the four independent  
510 experiments just described were imaged using an ImageXpress Micro XL automated

511 microscope imager (Molecular Devices). Diameters of 20 cell clusters per plasmid  
512 construct per experiment were quantified using MetaXpress image analysis software  
513 v6.5 (Molecular Devices). To compare numbers of clusters, single cells, and cluster  
514 diameters, statistical analyses were performed using unpaired t-tests with GraphPad  
515 Prism 7 (GraphPad).

516 **Transfection-Infection Experiments in Caco-2 cells.** For short-term rotavirus  
517 transfection-infection experiments, Caco-2 cells ( $\sim 1 \times 10^5$  per well) in 24-well plates  
518 were transfected with 0.5, 1, or 2  $\mu\text{g}$  of plasmid DNA per well using TransIT-LT1  
519 transfection reagent in OptiMEM and incubated at  $37^\circ\text{C}$  for 3 h. Medium was removed  
520 from the transfected cells and replaced with serum-free MEM for 1 h prior to virus  
521 adsorption. SA11 rotavirus was activated by incubation with 1  $\mu\text{g}/\text{ml}$  trypsin at  $37^\circ\text{C}$  for  
522 1 h. Medium was removed from the cells, and they were adsorbed with activated SA11  
523 rotavirus diluted in 0.1 ml of serum-free MEM per well to a MOI of 0.1 PFU/cell at  $37^\circ\text{C}$   
524 for 1 h. After adsorption, cells were washed then incubated in serum-free MEM  
525 containing 0.5  $\mu\text{g}/\text{ml}$  of trypsin at  $37^\circ\text{C}$  for 16 h. Cell lysates were harvested after three  
526 rounds of freezing and thawing, and virus in the resultant lysates was quantified by FFA.

527 For longer-term rotavirus transfection-infection experiments, Caco-2 cells ( $\sim 1 \times$   
528  $10^5$  per well) in 24-well plates were transfected with 1  $\mu\text{g}$  of plasmid DNA per well using  
529 TransIT-LT1 transfection reagent in OptiMEM and incubated at  $37^\circ\text{C}$  for 3 h. Medium  
530 was removed from the transfected cells and replaced with serum-free MEM for 1 h prior  
531 to virus adsorption. SA11 rotavirus was activated by incubation with 1  $\mu\text{g}/\text{ml}$  trypsin at  
532  $37^\circ\text{C}$  for 1 h. Medium was removed from the cells, and they were adsorbed with  
533 activated SA11 rotavirus diluted in 0.1 ml of serum-free MEM per well to a MOI of 1



534 PFU/cell at 37°C for 1 h. After adsorption, cells were washed then incubated in MEM  
535 containing 20% FBS at 37°C for 24 or 48 h. Cell lysates were harvested after three  
536 rounds of freezing and thawing, and virus in the resultant lysates was quantified by FFA.

537 **Transfection-Infection Experiments in 293T cells.** For short-term rotavirus  
538 transfection-infection experiments, 293T cells ( $\sim 2.5 \times 10^5$  per well) in 24-well plates  
539 were transfected with 50, 10, or 2 ng of plasmid DNA per well using LyoVec and  
540 incubated at 37°C for 3 h. Medium was removed from the transfected cells and replaced  
541 with serum-free DMEM for 1 h prior to virus adsorption. SA11 rotavirus was activated by  
542 incubation with 1  $\mu\text{g/ml}$  trypsin at 37°C for 1 h. Medium was removed from the cells, and  
543 they were adsorbed with activated SA11 rotavirus diluted in 0.1 ml of serum-free DMEM  
544 per well to a MOI of 1 PFU/cell at 37°C for 1 h. After adsorption, cells were washed then  
545 incubated in serum-free DMEM containing 0.5  $\mu\text{g/ml}$  trypsin at 37°C for 16 h. Cell  
546 lysates were harvested after three rounds of freezing and thawing, and virus in the  
547 resultant lysates was quantified by FFA.

548 For longer-term rotavirus transfection-infection experiments, 293T cells ( $\sim 2.5 \times$   
549  $10^5$  per well) in 24-well plates were transfected with 6 ng of plasmid DNA per well using  
550 LyoVec and incubated at 37°C for 3 h. Medium was removed from the transfected cells  
551 and replaced with serum-free DMEM for 1 h prior to virus adsorption. SA11 rotavirus  
552 was activated by incubation with 1  $\mu\text{g/ml}$  trypsin at 37°C for 1 h. Medium was removed  
553 from the cells, and they were adsorbed with activated SA11 rotavirus diluted in 0.1 ml of  
554 serum-free DMEM per well to a MOI of 0.1 PFU/cell at 37°C for 1 h. After adsorption,  
555 cells were washed then incubated in DMEM containing 10% FBS at 37°C for 24 or 48 h.

556 Cell lysates were harvested after three rounds of freezing and thawing, and virus in the  
557 resultant lysates was quantified by FFA.

558 **Fluorescent focus assay.** MA104 cells ( $4 \times 10^5$  per well) were seeded in black-  
559 wall 96-well plates and incubated overnight until near confluency. Infected cell lysates  
560 were activated with 1  $\mu\text{g/ml}$  trypsin for at  $37^\circ\text{C}$  for 1 h then serially diluted in serum-free  
561 MEM. Medium was removed from MA104 cells, they were washed twice in serum-free  
562 MEM and adsorbed with serial virus dilutions at  $37^\circ\text{C}$  for 1 h. Inocula were removed,  
563 cells were washed with serum-free MEM then incubated in fresh medium at  $37^\circ\text{C}$  for 14-  
564 18 h. Cells were fixed with cold methanol, and rotavirus proteins were detected by  
565 incubation with sheep polyclonal rotavirus antiserum at a 1:500 dilution in PBS  
566 containing 0.5% Triton X-100 at  $37^\circ\text{C}$ , followed by incubation with Alexa Fluor 488-  
567 conjugated anti-sheep IgG diluted 1:1000 and 300 nM DAPI. Images were captured for  
568 four fields of view per well using an ImageXpress Micro XL automated microscope  
569 imager (Molecular Devices). Total and percent infected cells were quantified using  
570 MetaXpress high-content image acquisition and analysis software (Molecular Devices).  
571 Fluorescent foci from four fields of view in duplicate wells for each sample were  
572 quantified. Statistical analyses were performed using GraphPad Prism 7 (GraphPad).  
573 Virus titers in cells transfected with plasmids expressing NBV p10 or RBV NSP1-1 were  
574 compared to those in vector-transfected cells using an unpaired t-test.

575 **Amino acid alignments and phylogenetic analysis.** Sequences of NSP1-1  
576 were obtained from GenBank. Accession numbers for FAST sequences analyzed for  
577 the ML tree shown in [Fig. 3A](#) and alignment in [Fig. 3B](#) are ACN38055, ADZ31982,  
578 ABV01045, AAM92750, AAM92738, AAF45151, ABY78878, AAF45157.1, ABM67655,

579 ACU68609, AAP03134, AHL26969, and AAL01373. Accession numbers for rotavirus  
580 segment 5 source sequences for NSP1-1 proteins analyzed for the ML tree shown in  
581 [Fig. 3A](#) are KY689691, NC\_021546, KX362373, KC876005, NC\_021583, NC\_026820,  
582 and KY026790. In each case, the smaller ORF sequence was analyzed. Accession  
583 numbers for rotavirus segment 5 source sequences for NSP1-1 proteins in [Figs. 3B and](#)  
584 [S1](#) are indicated.

585 For phylogenetic analysis, amino acid sequences were aligned using the  
586 MUSCLE algorithm in MEGA 7.0 (62). The Le Gascuel 2008 model (63) was selected  
587 as the best-fit model by Modeltest and used in maximum likelihood (ML) phylogeny  
588 construction with 1000 bootstrap replicates (in MEGA 7.0). Initial tree(s) for the heuristic  
589 search were obtained automatically by applying Neighbor-Join and BioNJ algorithms to  
590 a matrix of pairwise distances estimated using a JTT model, and then selecting the  
591 topology with superior log likelihood value. A discrete Gamma distribution was used to  
592 model evolutionary rate differences among sites (5 categories (+G, parameter =  
593 8.9228)). The tree with the highest log likelihood is shown in [Fig. 3A](#). The ML tree was  
594 visualized using FigTree v1.4.2 (<http://tree.bio.ed.ac.uk/software/figtree/>).

595 For [Figs. 3B and S1](#), amino acid alignments were constructed with MAFFT v7.2  
596 (64) using the E-INS-I strategy. N-myristylation motifs were defined using ScanProsite  
597 (65). Transmembrane helices were predicted with the TMHMM Server v2.0  
598 ([www.cbs.dtu.dk/services/TMHMM/](http://www.cbs.dtu.dk/services/TMHMM/)). Hydrophobic, polybasic, and polyproline regions  
599 for FAST proteins were identified previously (31). Hydrophobic patches for NSP1-1  
600 proteins were identified using ProtScale, with a window size of nine amino acids (66).  
601 Polybasic regions for NSP1-1 proteins were identified visually.

602

603 **ACKNOWLEDGEMENTS**

604           We thank Dr. Takeshi Kobayashi for NBV p10 in pCAGGS and Dr. Marco Morelli  
605 for pLIC6 and pLIC8 plasmids.

606           This research was supported in part by CTSA award No. UL1 TR002243 from  
607 the National Center for Advancing Translational Sciences. Its contents are solely the  
608 responsibility of the authors and do not necessarily represent official views of the  
609 National Center for Advancing Translational Sciences or the National Institutes of  
610 Health.

## 611 REFERENCES

- 612 1. **Estes MK, Greenberg HB.** 2013. Rotaviruses, p 1347-1401. *In* Knipe DM,  
613 Howley PM (ed), *Fields Virology*, Sixth ed, vol 2. Lippincott Williams & Wilkins,  
614 Philadelphia.
- 615 2. **Ding S, Zhu S, Ren L, Feng N, Song Y, Ge X, Li B, Flavell RA, Greenberg**  
616 **HB.** 2018. Rotavirus VP3 targets MAVS for degradation to inhibit type III  
617 interferon expression in intestinal epithelial cells. *Elife* **7**.
- 618 3. **Morelli M, Ogden KM, Patton JT.** 2015. Silencing the alarms: Innate immune  
619 antagonism by rotavirus NSP1 and VP3. *Virology* **479-480**:75-84.
- 620 4. **International Committee on Taxonomy of Viruses., King AMQ.** 2012. *Virus*  
621 *taxonomy : classification and nomenclature of viruses : ninth report of the*  
622 *International Committee on Taxonomy of Viruses.* Academic Press, London ;  
623 Waltham, MA.
- 624 5. **Ogden KM, Johne R, Patton JT.** 2012. Rotavirus RNA polymerases resolve into  
625 two phylogenetically distinct classes that differ in their mechanism of template  
626 recognition. *Virology* **431**:50-57.
- 627 6. **Matthijssens J, Otto PH, Ciarlet M, Desselberger U, Van Ranst M, Johne R.**  
628 2012. VP6-sequence-based cutoff values as a criterion for rotavirus species  
629 demarcation. *Arch Virol* **157**:1177-1182.
- 630 7. **Dhama K, Chauhan RS, Mahendran M, Malik SV.** 2009. Rotavirus diarrhea in  
631 bovines and other domestic animals. *Vet Res Commun* **33**:1-23.
- 632 8. **Martella V, Banyai K, Matthijssens J, Buonavoglia C, Ciarlet M.** 2010.  
633 Zoonotic aspects of rotaviruses. *Vet Microbiol* **140**:246-255.

- 634 9. **Doro R, Farkas SL, Martella V, Banyai K.** 2015. Zoonotic transmission of  
635 rotavirus: surveillance and control. *Expert Rev Anti Infect Ther* **13**:1337-1350.
- 636 10. **Brown DW, Beards GM, Chen GM, Flewett TH.** 1987. Prevalence of antibody  
637 to group B (atypical) rotavirus in humans and animals. *J Clin Microbiol* **25**:316-  
638 319.
- 639 11. **Marthaler D, Rossow K, Culhane M, Goyal S, Collins J, Matthijssens J,**  
640 **Nelson M, Ciarlet M.** 2014. Widespread rotavirus H in commercially raised pigs,  
641 United States. *Emerg Infect Dis* **20**:1195-1198.
- 642 12. **Marthaler D, Rossow K, Gramer M, Collins J, Goyal S, Tsunemitsu H, Kuga**  
643 **K, Suzuki T, Ciarlet M, Matthijssens J.** 2012. Detection of substantial porcine  
644 group B rotavirus genetic diversity in the United States, resulting in a modified  
645 classification proposal for G genotypes. *Virology* **433**:85-96.
- 646 13. **Joshi MS, Ganorkar NN, Ranshing SS, Basu A, Chavan NA, Gopalkrishna V.**  
647 2017. Identification of group B rotavirus as an etiological agent in the  
648 gastroenteritis outbreak in Maharashtra, India. *J Med Virol* **89**:2244-2248.
- 649 14. **Krishnan T, Sen A, Choudhury JS, Das S, Naik TN, Bhattacharya SK.** 1999.  
650 Emergence of adult diarrhoea rotavirus in Calcutta, India. *Lancet* **353**:380-381.
- 651 15. **Lahon A, Maniya NH, Tambe GU, Chinchole PR, Purwar S, Jacob G,**  
652 **Chitambar SD.** 2013. Group B rotavirus infection in patients with acute  
653 gastroenteritis from India: 1994-1995 and 2004-2010. *Epidemiol Infect* **141**:969-  
654 975.

- 655 16. **Sanekata T, Ahmed MU, Kader A, Taniguchi K, Kobayashi N.** 2003. Human  
656 group B rotavirus infections cause severe diarrhea in children and adults in  
657 Bangladesh. *J Clin Microbiol* **41**:2187-2190.
- 658 17. **Chen CM, Hung T, Bridger JC, McCrae MA.** 1985. Chinese adult rotavirus is a  
659 group B rotavirus. *Lancet* **2**:1123-1124.
- 660 18. **Eiden J, Vonderfecht S, Yolken RH.** 1985. Evidence that a novel rotavirus-like  
661 agent of rats can cause gastroenteritis in man. *Lancet* **2**:8-11.
- 662 19. **Hung T, Chen GM, Wang CG, Chou ZY, Chao TX, Ye WW, Yao HL, Meng KH.**  
663 1983. Rotavirus-like agent in adult non-bacterial diarrhoea in China. *Lancet*  
664 **2**:1078-1079.
- 665 20. **Hung T, Chen GM, Wang CG, Yao HL, Fang ZY, Chao TX, Chou ZY, Ye W,**  
666 **Chang XJ, Den SS, et al.** 1984. Waterborne outbreak of rotavirus diarrhoea in  
667 adults in China caused by a novel rotavirus. *Lancet* **1**:1139-1142.
- 668 21. **Sen A, Kobayashi N, Das S, Krishnan T, Bhattacharya SK, Naik TN.** 2001.  
669 The evolution of human group B rotaviruses. *Lancet* **357**:198-199.
- 670 22. **Saiada F, Rahman HN, Moni S, Karim MM, Pourkarim MR, Azim T, Rahman**  
671 **M.** 2011. Clinical presentation and molecular characterization of group B  
672 rotaviruses in diarrhoea patients in Bangladesh. *J Med Microbiol* **60**:529-536.
- 673 23. **Alam MM, Pun SB, Gauchan P, Yokoo M, Doan YH, Tran TN, Nakagomi T,**  
674 **Nakagomi O, Pandey BD.** 2013. The first identification of rotavirus B from  
675 children and adults with acute diarrhoea in kathmandu, Nepal. *Trop Med Health*  
676 **41**:129-134.

- 677 24. **Eiden JJ, Mouzinho A, Lindsay DA, Glass RI, Fang ZY, Taylor JL.** 1994.  
678 Serum antibody response to recombinant major inner capsid protein following  
679 human infection with group B rotavirus. *J Clin Microbiol* **32**:1599-1603.
- 680 25. **Nakata S, Estes MK, Graham DY, Wang SS, Gary GW, Melnick JL.** 1987.  
681 Detection of antibody to group B adult diarrhea rotaviruses in humans. *J Clin*  
682 *Microbiol* **25**:812-818.
- 683 26. **Suzuki T, Kuga K, Miyazaki A, Tsunemitsu H.** 2011. Genetic divergence and  
684 classification of non-structural protein 1 among porcine rotaviruses of species B.  
685 *J Gen Virol* **92**:2922-2929.
- 686 27. **Fang ZY, Glass RI, Penaranda M, Dong H, Monroe SS, Wen L, Estes MK,**  
687 **Eiden J, Yolken RH, Saif L, et al.** 1989. Purification and characterization of  
688 adult diarrhea rotavirus: identification of viral structural proteins. *J Virol* **63**:2191-  
689 2197.
- 690 28. **Fang ZY, Monroe SS, Dong H, Penaranda M, Wen L, Gouvea V, Allen JR,**  
691 **Hung T, Glass RI.** 1992. Coding assignments of the genome of adult diarrhea  
692 rotavirus. *Arch Virol* **125**:53-69.
- 693 29. **Eiden JJ.** 1994. Expression and sequence analysis of gene 7 of the IDIR agent  
694 (group B rotavirus): similarity with NS53 of group A rotavirus. *Virology* **199**:212-  
695 218.
- 696 30. **Boutillier J, Duncan R.** 2011. The reovirus fusion-associated small  
697 transmembrane (FAST) proteins: virus-encoded cellular fusogens. *Curr Top*  
698 *Membr* **68**:107-140.



- 699 31. **Ciechonska M, Duncan R.** 2014. Reovirus FAST proteins: virus-encoded  
700 cellular fusogens. *Trends Microbiol* **22**:715-724.
- 701 32. **Kanai Y, Komoto S, Kawagishi T, Nouda R, Nagasawa N, Onishi M,**  
702 **Matsuura Y, Taniguchi K, Kobayashi T.** 2017. Entirely plasmid-based reverse  
703 genetics system for rotaviruses. *Proc Natl Acad Sci U S A* **114**:2349-2354.
- 704 33. **Kanai Y, Kawagishi T, Sakai Y, Nouda R, Shimojima M, Saijo M, Matsuura Y,**  
705 **Kobayashi T.** 2019. Cell-cell fusion induced by reovirus FAST proteins  
706 enhances replication and pathogenicity of non-enveloped dsRNA viruses. *PLoS*  
707 *Pathog* **15**:e1007675.
- 708 34. **Key T, Duncan R.** 2014. A compact, multifunctional fusion module directs  
709 cholesterol-dependent homomultimerization and syncytiogenic efficiency of  
710 reovirus p10 FAST proteins. *PLoS Pathog* **10**:e1004023.
- 711 35. **Salsman J, Top D, Boutilier J, Duncan R.** 2005. Extensive syncytium formation  
712 mediated by the reovirus FAST proteins triggers apoptosis-induced membrane  
713 instability. *J Virol* **79**:8090-8100.
- 714 36. **Corcoran JA, Duncan R.** 2004. Reptilian reovirus utilizes a small type III protein  
715 with an external myristylated amino terminus to mediate cell-cell fusion. *J Virol*  
716 **78**:4342-4351.
- 717 37. **Corcoran JA, Syvitski R, Top D, Epand RM, Epand RF, Jakeman D, Duncan**  
718 **R.** 2004. Myristoylation, a protruding loop, and structural plasticity are essential  
719 features of a nonenveloped virus fusion peptide motif. *J Biol Chem* **279**:51386-  
720 51394.

- 721 38. **Dawe S, Corcoran JA, Clancy EK, Salsman J, Duncan R.** 2005. Unusual  
722 topological arrangement of structural motifs in the baboon reovirus fusion-  
723 associated small transmembrane protein. *J Virol* **79**:6216-6226.
- 724 39. **Dawe S, Duncan R.** 2002. The S4 genome segment of baboon reovirus is  
725 bicistronic and encodes a novel fusion-associated small transmembrane protein.  
726 *J Virol* **76**:2131-2140.
- 727 40. **Shmulevitz M, Epand RF, Epand RM, Duncan R.** 2004. Structural and  
728 functional properties of an unusual internal fusion peptide in a nonenveloped  
729 virus membrane fusion protein. *J Virol* **78**:2808-2818.
- 730 41. **Barry C, Key T, Haddad R, Duncan R.** 2010. Features of a spatially constrained  
731 cystine loop in the p10 FAST protein ectodomain define a new class of viral  
732 fusion peptides. *J Biol Chem* **285**:16424-16433.
- 733 42. **Key T, Sarker M, de Antueno R, Rainey JK, Duncan R.** 2015. The p10 FAST  
734 protein fusion peptide functions as a cystine noose to induce cholesterol-  
735 dependent liposome fusion without liposome tubulation. *Biochim Biophys Acta*  
736 **1848**:408-416.
- 737 43. **Shmulevitz M, Salsman J, Duncan R.** 2003. Palmitoylation, membrane-  
738 proximal basic residues, and transmembrane glycine residues in the reovirus p10  
739 protein are essential for syncytium formation. *J Virol* **77**:9769-9779.
- 740 44. **Shmulevitz M, Duncan R.** 2000. A new class of fusion-associated small  
741 transmembrane (FAST) proteins encoded by the non-enveloped fusogenic  
742 reoviruses. *EMBO J* **19**:902-912.

- 743 45. **Parmar HB, Barry C, Duncan R.** 2014. Polybasic trafficking signal mediates  
744 golgi export, ER retention or ER export and retrieval based on membrane-  
745 proximity. *PLoS One* **9**:e94194.
- 746 46. **Parmar HB, Duncan R.** 2016. A novel tribasic Golgi export signal directs cargo  
747 protein interaction with activated Rab11 and AP-1-dependent Golgi-plasma  
748 membrane trafficking. *Mol Biol Cell* **27**:1320-1331.
- 749 47. **Parmar HB, Barry C, Kai F, Duncan R.** 2014. Golgi complex-plasma membrane  
750 trafficking directed by an autonomous, tribasic Golgi export signal. *Mol Biol Cell*  
751 **25**:866-878.
- 752 48. **Clancy EK, Duncan R.** 2009. Reovirus FAST protein transmembrane domains  
753 function in a modular, primary sequence-independent manner to mediate cell-cell  
754 membrane fusion. *J Virol* **83**:2941-2950.
- 755 49. **Salim AF, Phillips AD, Walker-Smith JA, Farthing MJ.** 1995. Sequential  
756 changes in small intestinal structure and function during rotavirus infection in  
757 neonatal rats. *Gut* **36**:231-238.
- 758 50. **Vonderfecht SL, Huber AC, Eiden J, Mader LC, Yolken RH.** 1984. Infectious  
759 diarrhea of infant rats produced by a rotavirus-like agent. *J Virol* **52**:94-98.
- 760 51. **Theil KW, Grooms DL, McCloskey CM, Redman DR.** 1995. Group B rotavirus  
761 associated with an outbreak of neonatal lamb diarrhea. *J Vet Diagn Invest* **7**:148-  
762 150.
- 763 52. **Sanekata T, Kuwamoto Y, Akamatsu S, Sakon N, Oseto M, Taniguchi K,**  
764 **Nakata S, Estes MK.** 1996. Isolation of group B porcine rotavirus in cell culture.  
765 *J Clin Microbiol* **34**:759-761.

- 766 53. **Salsman J, Top D, Barry C, Duncan R.** 2008. A virus-encoded cell-cell fusion  
767 machine dependent on surrogate adhesins. *PLoS Pathog* **4**:e1000016.
- 768 54. **Hayashi M, Murakami T, Kuroda Y, Takai H, Ide H, Awang A, Suzuki T,**  
769 **Miyazaki A, Nagai M, Tsunemitsu H.** 2016. Reinfection of adult cattle with  
770 rotavirus B during repeated outbreaks of epidemic diarrhea. *Can J Vet Res*  
771 **80**:189-196.
- 772 55. **Velazquez FR, Matson DO, Calva JJ, Guerrero L, Morrow AL, Carter-**  
773 **Campbell S, Glass RI, Estes MK, Pickering LK, Ruiz-Palacios GM.** 1996.  
774 Rotavirus infection in infants as protection against subsequent infections. *N Engl*  
775 *J Med* **335**:1022-1028.
- 776 56. **Arnold MM.** 2016. The Rotavirus Interferon Antagonist NSP1: Many Targets,  
777 Many Questions. *J Virol* **90**:5212-5215.
- 778 57. **Nibert ML, Duncan R.** 2013. Bioinformatics of recent aqua- and orthoreovirus  
779 isolates from fish: evolutionary gain or loss of FAST and fiber proteins and  
780 taxonomic implications. *PLoS One* **8**:e68607.
- 781 58. **Saxena K, Blutt SE, Ettayebi K, Zeng XL, Broughman JR, Crawford SE,**  
782 **Karandikar UC, Sastri NP, Conner ME, Opekun AR, Graham DY, Qureshi W,**  
783 **Sherman V, Foulke-Abel J, In J, Kovbasnjuk O, Zachos NC, Donowitz M,**  
784 **Estes MK.** 2016. Human Intestinal Enteroids: a New Model To Study Human  
785 Rotavirus Infection, Host Restriction, and Pathophysiology. *J Virol* **90**:43-56.
- 786 59. **Kobayashi T, Ooms LS, Ikizler M, Chappell JD, Dermody TS.** 2010. An  
787 improved reverse genetics system for mammalian orthoreoviruses. *Virology*  
788 **398**:194-200.

- 789 60. **Arnold M, Patton JT, McDonald SM.** 2009. Culturing, storage, and  
790 quantification of rotaviruses. *Curr Protoc Microbiol* **Chapter 15**:Unit 15C 13.
- 791 61. **Yamamoto D, Ghosh S, Ganesh B, Krishnan T, Chawla-Sarkar M, Alam MM,**  
792 **Aung TS, Kobayashi N.** 2010. Analysis of genetic diversity and molecular  
793 evolution of human group B rotaviruses based on whole genome segments. *J*  
794 *Gen Virol* **91**:1772-1781.
- 795 62. **Kumar S, Stecher G, Tamura K.** 2016. MEGA7: Molecular Evolutionary  
796 Genetics Analysis Version 7.0 for Bigger Datasets. *Mol Biol Evol* **33**:1870-1874.
- 797 63. **Le SQ, Gascuel O.** 2008. An improved general amino acid replacement matrix.  
798 *Mol Biol Evol* **25**:1307-1320.
- 799 64. **Katoh K, Standley DM.** 2013. MAFFT multiple sequence alignment software  
800 version 7: improvements in performance and usability. *Mol Biol Evol* **30**:772-780.
- 801 65. **de Castro E, Sigrist CJ, Gattiker A, Bulliard V, Langendijk-Genevaux PS,**  
802 **Gasteiger E, Bairoch A, Hulo N.** 2006. ScanProsite: detection of PROSITE  
803 signature matches and ProRule-associated functional and structural residues in  
804 proteins. *Nucleic Acids Res* **34**:W362-365.
- 805 66. **Gasteiger E, Hoogland C, Gattiker A, Duvaud S, Wilkins MR, Appel RD,**  
806 **Bairoch A.** 2005. Protein Identification and Analysis Tools on the ExPASy  
807 Server, p 571 - 607. *In* Walker JM (ed), *The Proteomics Protocols Handbook*.  
808 Humana Press.

809

810

811 **FIGURE LEGENDS**

A

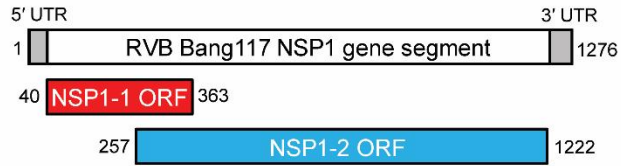

B

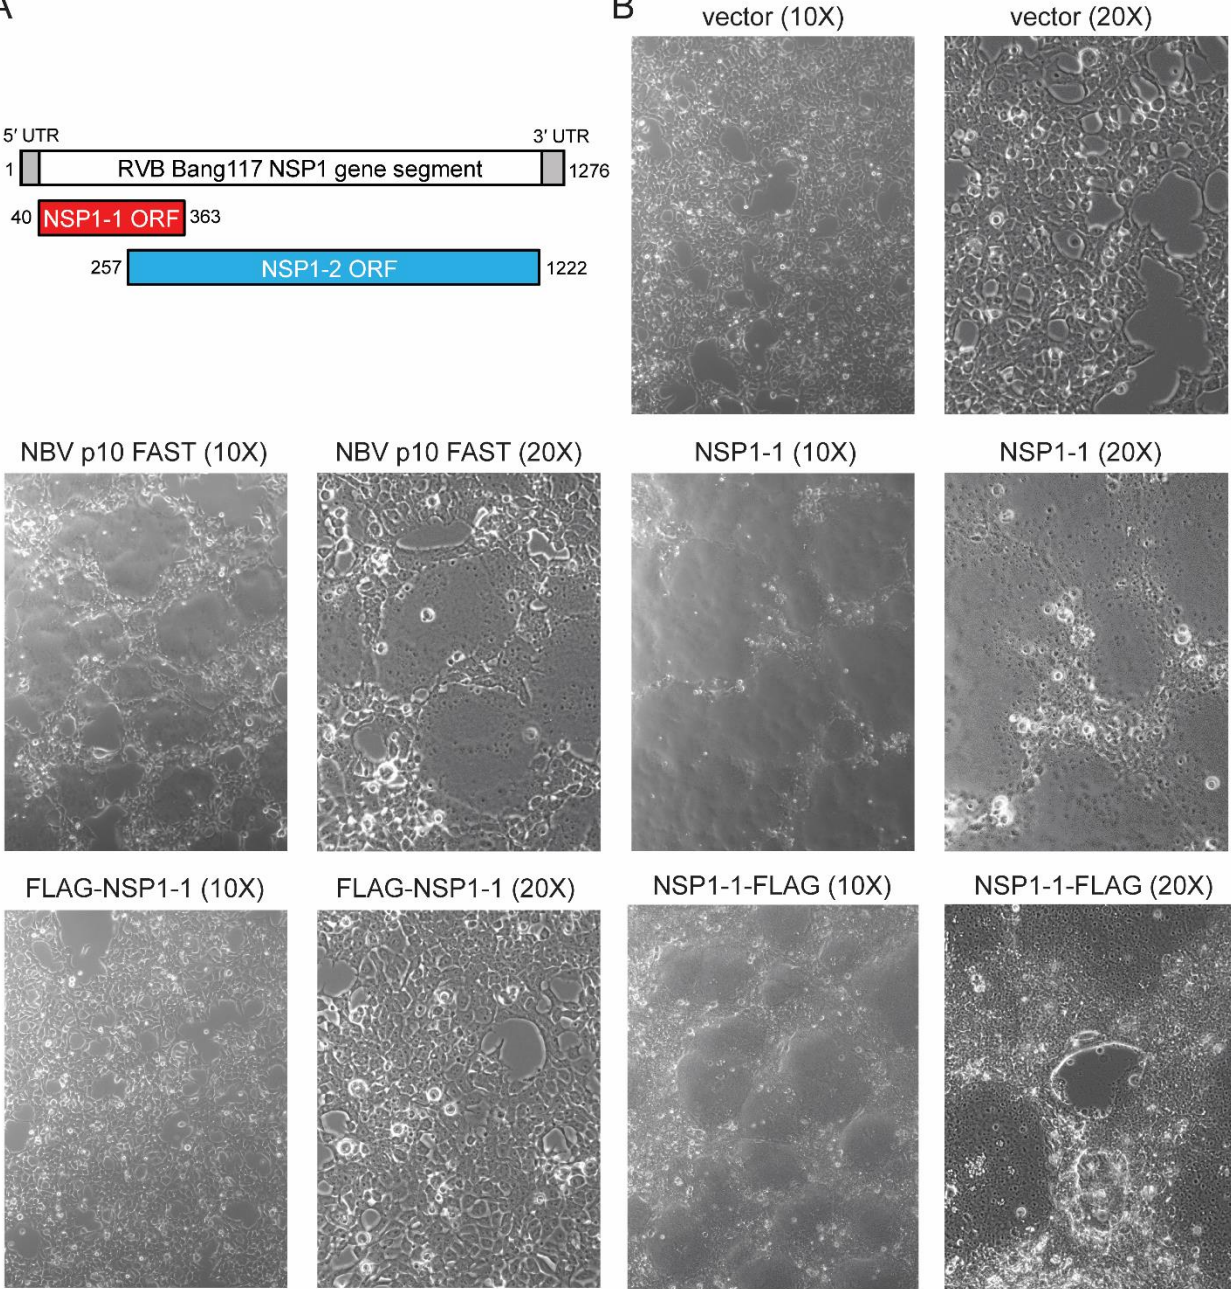

812

813 **Figure 1.** RVB Bang117 NSP1-1 mediates syncytia formation in 293T cells. (A)  
814 Schematic showing the organization of RVB Bang117 NSP1 gene segment, including  
815 untranslated regions (UTRs) and two putative ORFs. (B) Differential interference  
816 contrast images of 293T cells transfected with vector alone or plasmids encoding NBV  
817 p10 FAST or RVB Bang117 NSP1-1 in its untagged form or with an N- or C-terminal  
818 FLAG tag. Representative images are shown. Plasmids used for transfection and  
819 objective lens magnification are indicated.

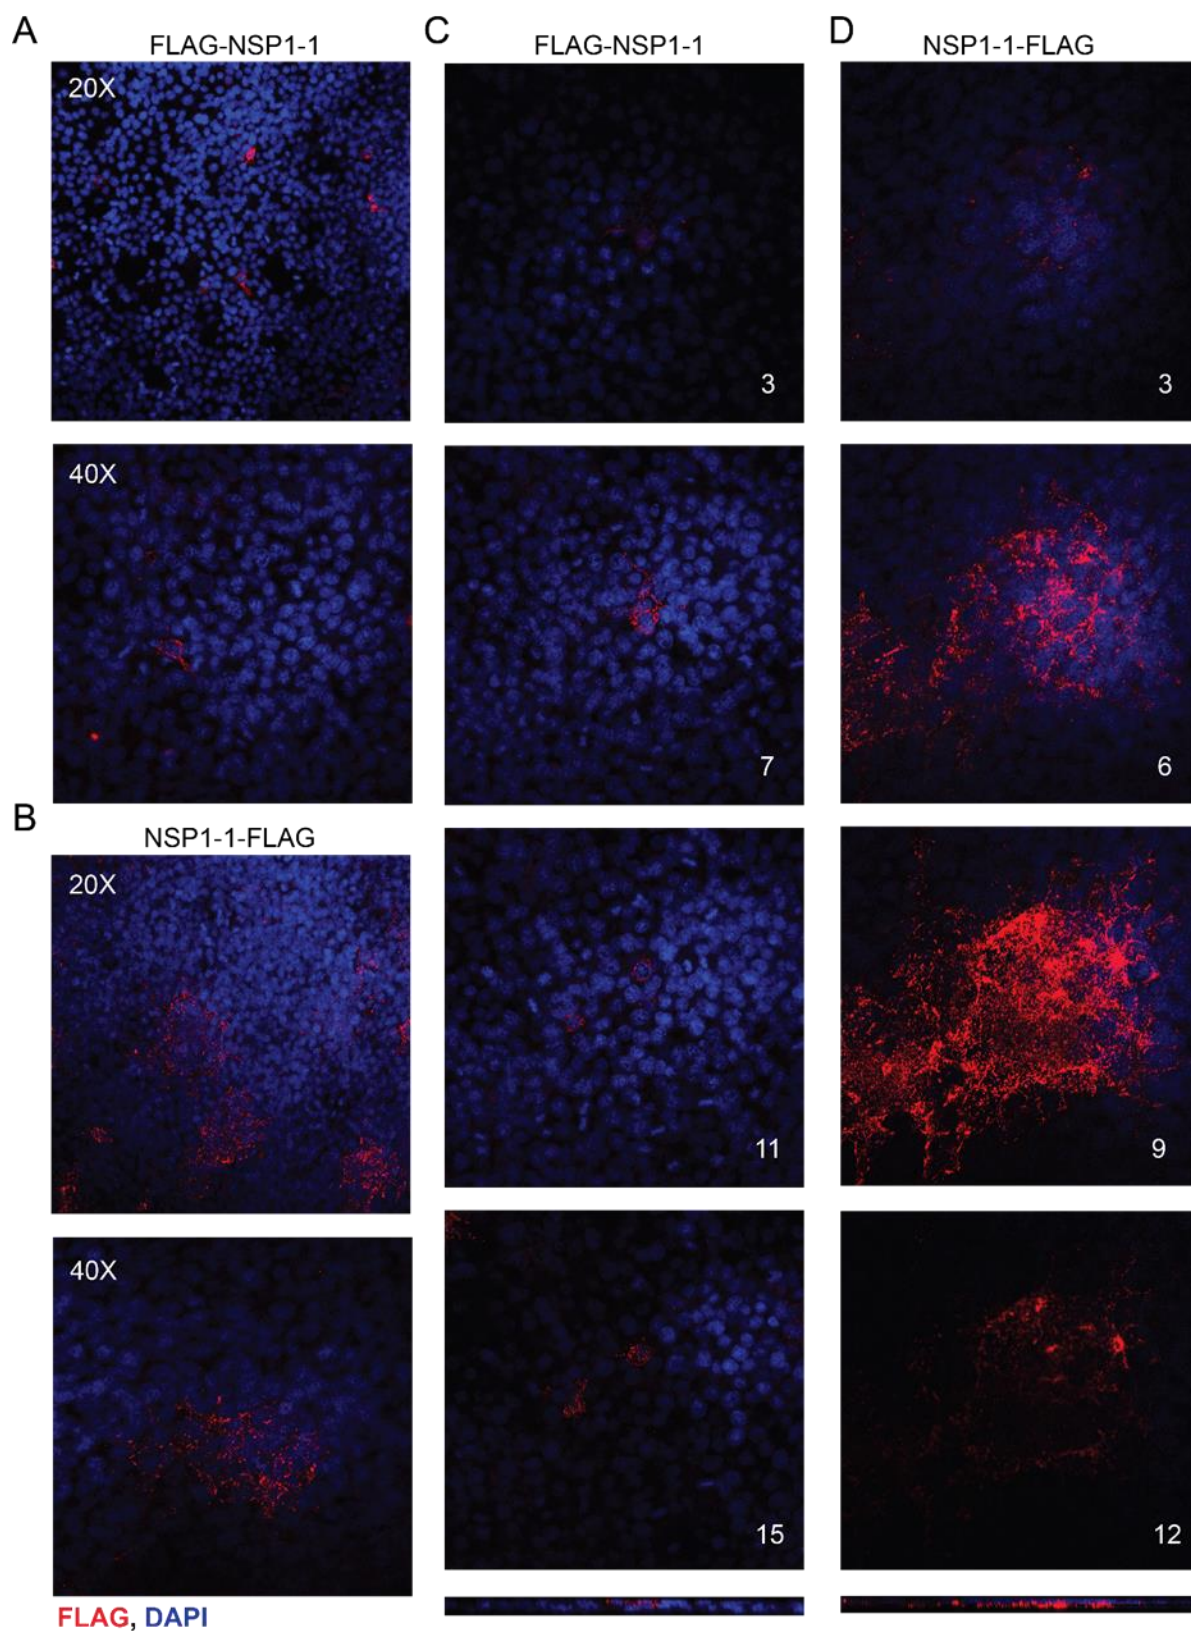

820

821 **Figure 2.** RVB Bang117 NSP1-1 localization in 293T cells. 293T cells were transfected with plasmids encoding RVB Bang117 NSP1-1 with an N- or C-terminal FLAG tag, as  
822

823 indicated. Cells were fixed and stained with antibodies to detect FLAG (red) or nuclei  
824 (blue) and imaged using confocal microscopy. (A-B) Images from a single confocal  
825 plane of 293T cells transfected with plasmids encoding FLAG-NSP1-1 (A) or NSP1-1-  
826 FLAG (B) taken using the 20X or 40X objective, as indicated. (C-D) Confocal images  
827 from comparable focal planes in a Z-stack taken using the 40X objective for 293T cells  
828 transfected with plasmids encoding FLAG-NSP1-1 (B) or NSP1-1-FLAG (C). Z-section  
829 number is indicated; numbers increase coincident with distance from the adherent  
830 surface of the monolayer. Bars at the bottom represent orthogonal views through the Z-  
831 stack, approximately at the center of the images.  
832



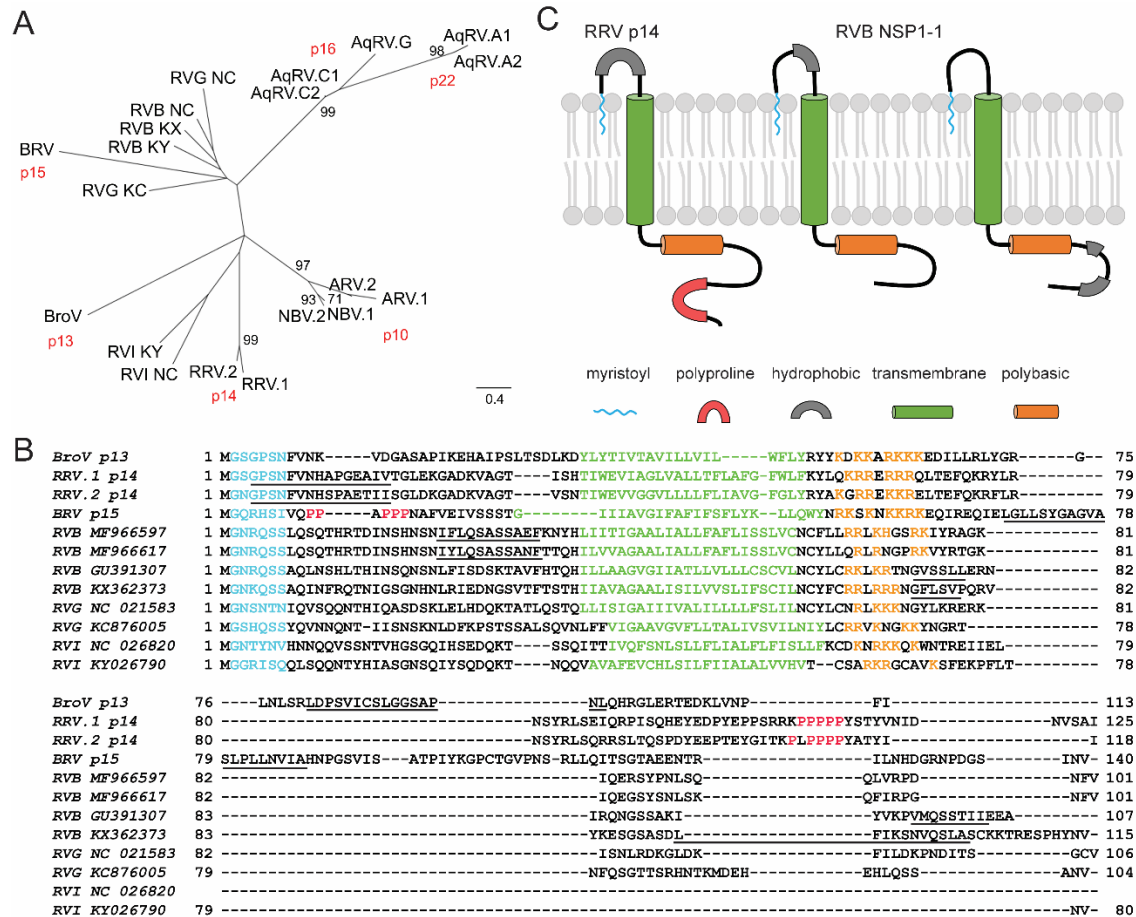

833

834 **Figure 3.** Conserved features of *Reoviridae* FAST proteins. (A) Maximum likelihood tree  
835 showing relationships among *Reoviridae* FAST and rotavirus NSP1-1 proteins.  
836 Abbreviations are: AqRV.A1, Atlantic salmon aquareovirus; AqRV.A2, Turbot  
837 aquareovirus; AqRV.G, American grass carp aquareovirus; AqRV.C1, Golden shiner  
838 aquareovirus; AqRV.C2, Grass carp aquareovirus; ARV.1, Avian orthoreovirus 176;  
839 ARV.2, Psittacine orthoreovirus; NBV.1, Nelson Bay orthoreovirus; NBV.2, Melaka  
840 orthoreovirus; BroV, Broome orthoreovirus; RRV.1, Python orthoreovirus; RRV.2, Green  
841 bush viper orthoreovirus; BRV, Baboon orthoreovirus; RVB KY, Rotavirus B strain  
842 RVB/Goat-wt/USA/Minnesota-1/2016; RVB KX, Rotavirus B strain RVB/Pig-  
843 wt/VNM/12089\_7; RVB NC, Human rotavirus B strain Bang373; RVG KC, Rotavirus G  
844 pigeon/HK18; RVG NC, Rotavirus G chicken/03V0567/DEU/2003; RVI NC, Rotavirus I  
845 strain KE135/2012; RVI KY, Rotavirus I cat. Scale, in amino acid substitutions per site,  
846 is indicated. (B) Alignment of selected *Reoviridae* FAST and rotavirus NSP1-1 proteins.  
847 Abbreviations for FAST proteins are as in (A). Rotavirus species (RVB, RVG, or RVI)  
848 and accession number are indicated. Predicted N-myristoylation motifs are colored  
849 cyan, transmembrane helices are colored green, polybasic regions are colored orange,  
850 polyproline regions are colored red, and hydrophobic regions are underlined. (C)  
851 Cartoon models highlighting the predicted features and membrane topology for the RRV  
852 p14 FAST protein and for RVB NSP1-1. Features and models of BroV p13, RRV p14,  
853 and BRV p15 shown in (B) and (C) are based on previously published work (31).

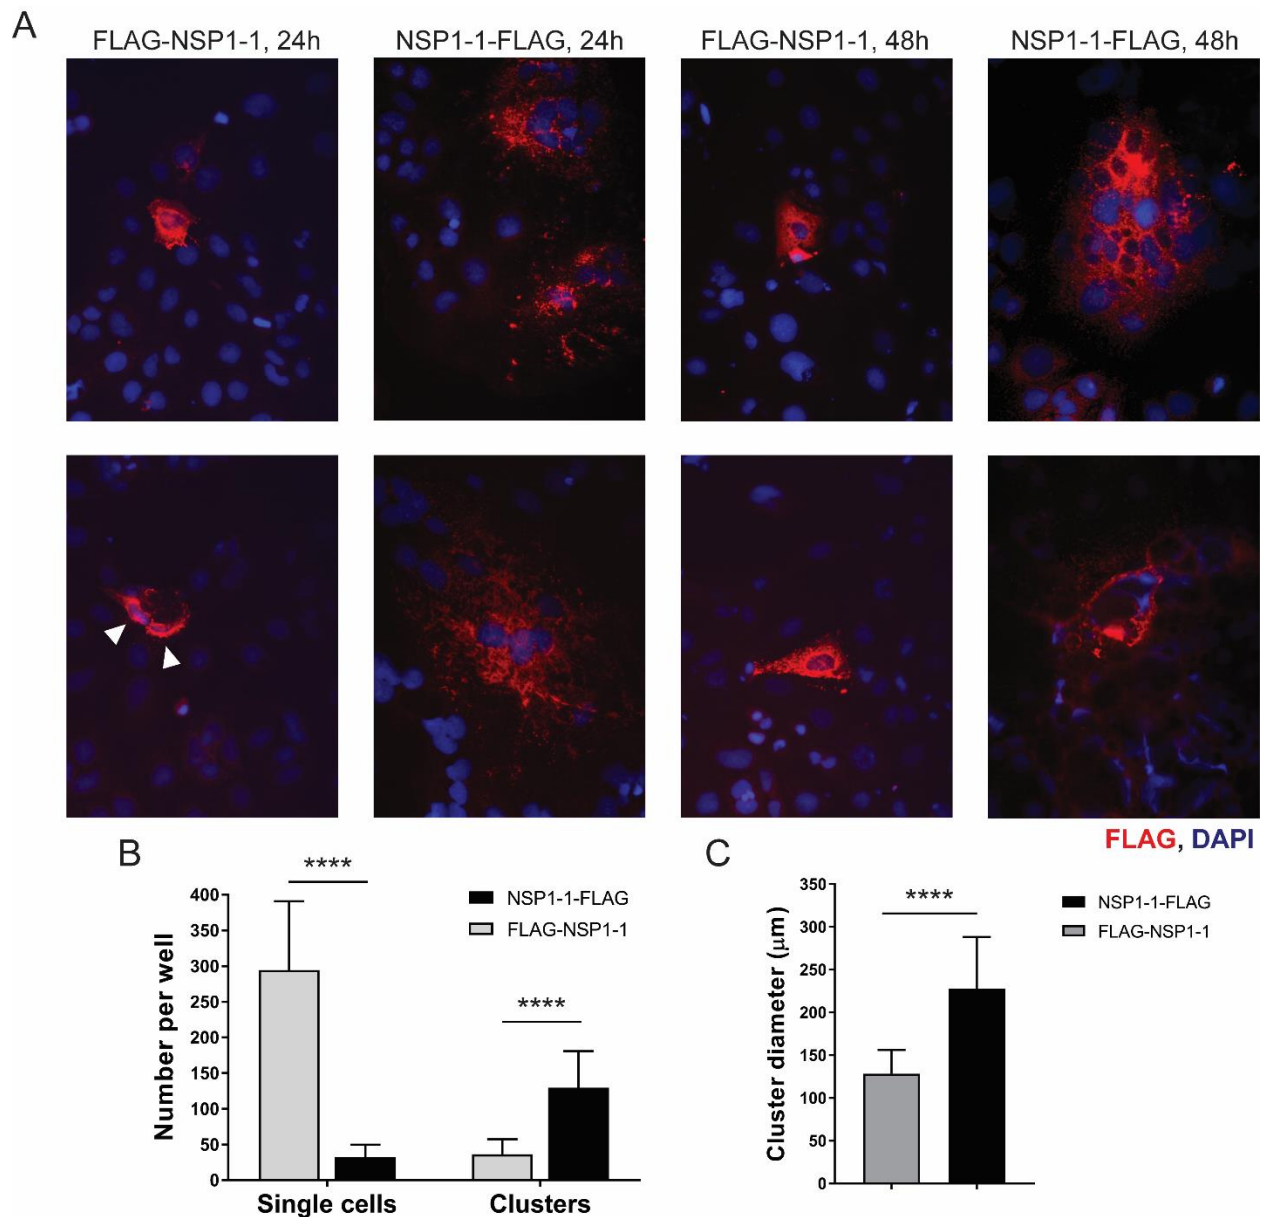

854

855 **Figure 4.** RVB Bang117 FAST mediates syncytia formation in Caco-2 cells. Caco-2  
856 cells in 24-well plates were transfected with plasmids encoding RVB Bang117 NSP1-1  
857 with an N- or C-terminal FLAG tag. Cells were fixed and stained with antibodies to  
858 detect FLAG (red) or nuclei (blue) and imaged using immunofluorescence microscopy  
859 at 24 and 48 h post transfection. (A) Representative images are shown. White triangles  
860 indicate adjacent FLAG-positive FLAG-NSP1-1-transfected cells. (B) The numbers of  
861 FLAG-positive clusters (3 or more adjacent cells) and FLAG-positive single cells per  
862 well were quantified in three wells per experiment in four independent experiments.  $n =$   
863 12. (C) The diameters of 20 FLAG-positive clusters per experiment in four independent  
864 experiments were quantified.  $n = 80$ . \*\*\*\*,  $p < 0.0001$  by unpaired  $t$  test.

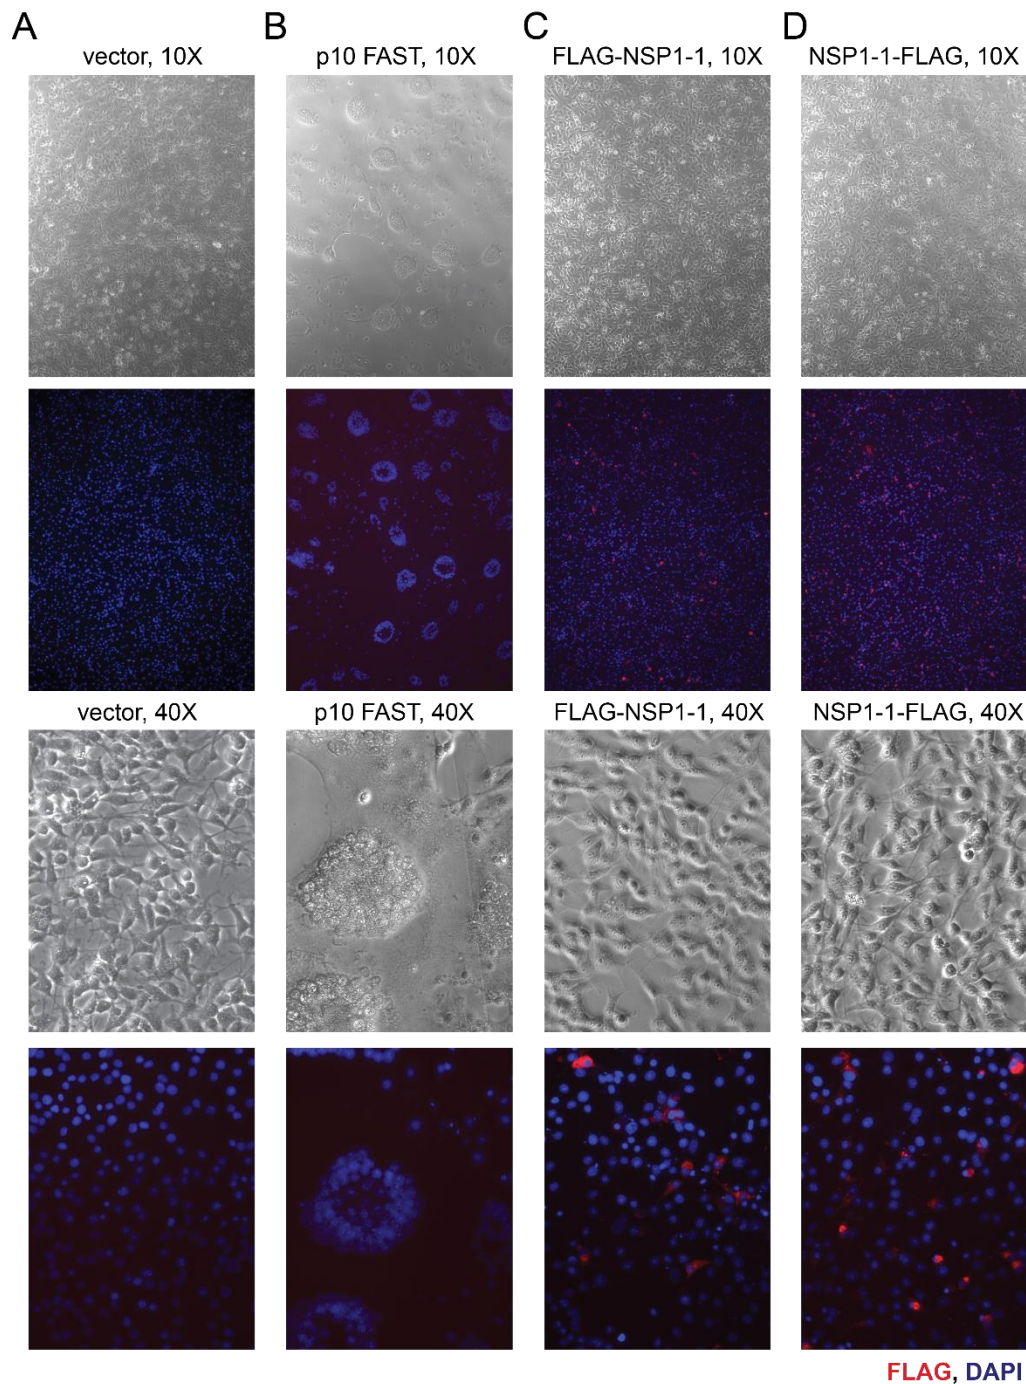

865

866 **Figure 5.** RVB NSP1-1 fails to mediate fusion and exhibits perinuclear localization in  
867 BHK cells. BHK-T7 cells were transfected with vector alone (A) or plasmids encoding  
868 NBV p10 FAST (B) or RVB Bang117 NSP1-1 with an N-terminal (C) or C-terminal (D)  
869 FLAG tag. Cells were fixed and stained with antibodies to detect FLAG (red) or nuclei  
870 (blue) and imaged using both differential interference contrast and immunofluorescence  
871 microscopy. Representative images are shown. Plasmids used for transfection and  
872 objective lens magnification are indicated.

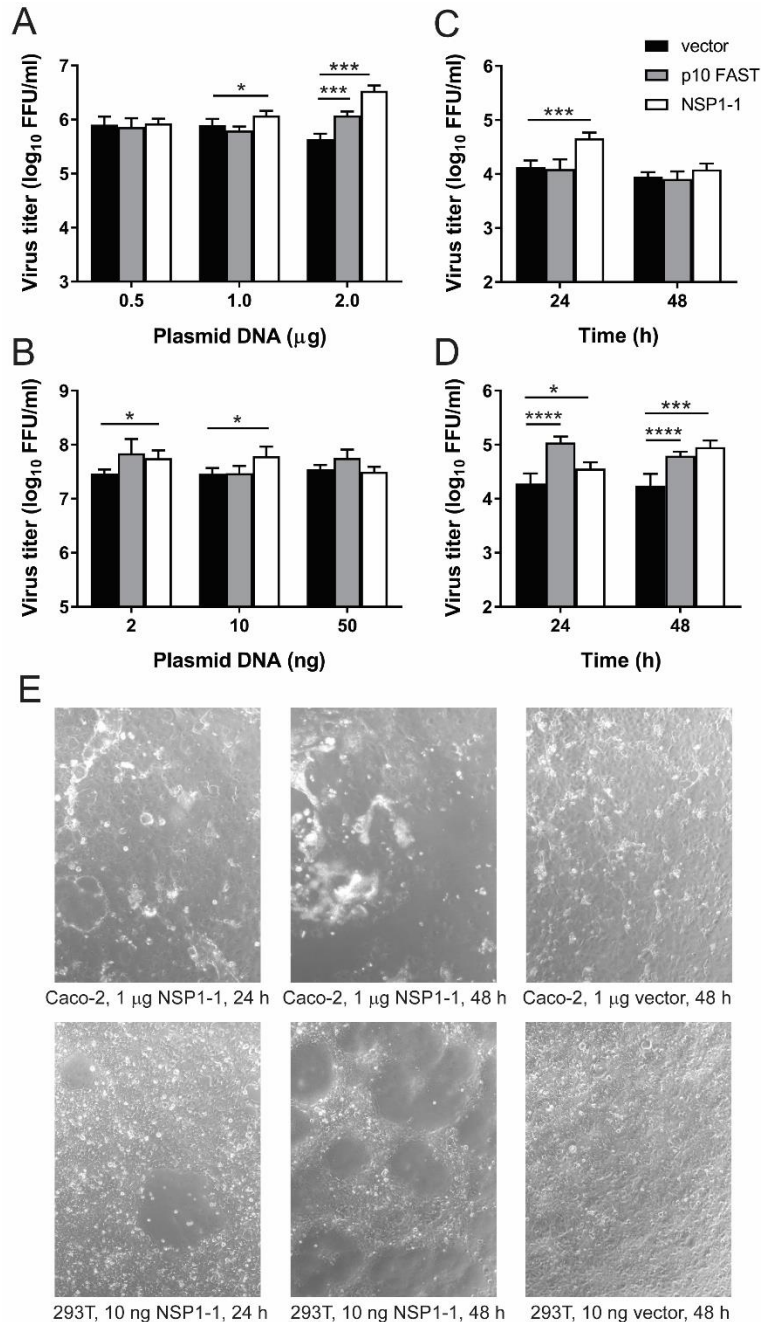

873

874 **Figure 6.** RVB Bang117 FAST mediates enhanced rotavirus replication in human cells.  
 875 (A-B) Short-term infection. Caco-2 cells (A) or 293T cells (B) were transfected with the  
 876 indicated amount of plasmid DNA. At 4 h post transfection, cells were adsorbed with  
 877 trypsin-activated SA11 rotavirus, washed, incubated in serum-free medium containing  
 878 trypsin at 37°C for 16 h, and lysed. Virus titers in cell lysates were quantified by FFA.  
 879 (C-D) Rotavirus spread in the presence of FBS. Caco-2 cells were transfected with 1  $\mu\text{g}$   
 880 of plasmid DNA (C), or 293T cells were transfected with 10 ng of plasmid DNA (D). At 4  
 881 h post transfection, cells were adsorbed with trypsin-activated SA11 rotavirus, washed,  
 882 incubated in MEM containing 20% (Caco-2) or 10% (293T) FBS for 0, 24, or 48 h, and  
 883 lysed. Virus titers in cell lysates were quantified by FFA.  $n = 3$ . \*,  $p < 0.05$ ; \*\*\*,  $p < 0.001$ ;

884 \*\*\*\*,  $p < 0.0001$  in comparison to vector alone by unpaired  $t$  test. (E) Cytopathic effects  
885 in transfected cells. Caco-2 or 293T cells were transfected with the indicated  
886 concentrations of plasmids and imaged using brightfield microscopy at 24 or 48 h post  
887 transfection to reveal gross morphological changes in the monolayer.  
888

889

```
Po RVB KY869733 1 MGNRQSSLSQSTHRDINDSHNSNIYLSQASSNEFTQCHILVVAAGALIALFA---FLVSSLVNCGYLLERLR--NPRKIVRTCKIQEGSYSSLKQPIREDHFV----- 101
Po RVB MF966617 1 MGNRQSSLSQSTHRDINDSHNSNIYLSQASSNEFTQCHILVVAAGALIALFA---FLVSSLVNCGYLLERLR--NPRKIVRTCKIQEGSYSSLKQPIREDHFV----- 101
Po RVB MF966616 1 MGNRQSSLSQSTHRDINDSHNSNIYLSQASSNEFTQCHILVVAAGALIALFA---FLVSSLVNCGYLLERLR--NPRKIVRTCKIQEGSYSSLKQPIREDHFV----- 101
Po RVB KX362395 1 MGNRQSSLSQSTHRDINDSHNSNIYLSQASSNEFTQCHILVVAAGALIALFA---FLVSSLVNCGYLLERLR--NPRKIVRTCKIQEGSYSSLKQPIREDHFV----- 101
Po RVB MF966615 1 MGNRQSSLSQSTHRDINDSHNSNIYLSQASSNEFTQCHILVVAAGALIALFA---FLVSSLVNCGYLLERLR--NPRKIVRTCKIQEGSYSSLKQPIREDHFV----- 101
Po RVB MF966614 1 MGNRQSSLSQSTHRDINDSHNSNIYLSQASSNEFTQCHILVVAAGALIALFA---FLVSSLVNCGYLLERLR--NPRKIVRTCKIQEGSYSSLKQPIREDHFV----- 101
Po RVB MF966613 1 MGNRQSSLSQSTHRDINDSHNSNIYLSQASSNEFTQCHILVVAAGALIALFA---FLVSSLVNCGYLLERLR--NPRKIVRTCKIQEGSYSSLKQPIREDHFV----- 101
Po RVB MF966612 1 MGNRQSSLSQSTHRDINDSHNSNIYLSQASSNEFTQCHILVVAAGALIALFA---FLVSSLVNCGYLLERLR--NPRKIVRTCKIQEGSYSSLKQPIREDHFV----- 101
Po RVB MF966611 1 MGNRQSSLSQSTHRDINDSHNSNIYLSQASSNEFTQCHILVVAAGALIALFA---FLVSSLVNCGYLLERLR--NPRKIVRTCKIQEGSYSSLKQPIREDHFV----- 101
Po RVB MF966610 1 MGNRQSSLSQSTHRDINDSHNSNIYLSQASSNEFTQCHILVVAAGALIALFA---FLVSSLVNCGYLLERLR--NPRKIVRTCKIQEGSYSSLKQPIREDHFV----- 101
Po RVB MF966609 1 MGNRQSSLSQSTHRDINDSHNSNIYLSQASSNEFTQCHILVVAAGALIALFA---FLVSSLVNCGYLLERLR--NPRKIVRTCKIQEGSYSSLKQPIREDHFV----- 101
Po RVB MF966608 1 MGNRQSSLSQSTHRDINDSHNSNIYLSQASSNEFTQCHILVVAAGALIALFA---FLVSSLVNCGYLLERLR--NPRKIVRTCKIQEGSYSSLKQPIREDHFV----- 101
Po RVB MF966607 1 MGNRQSSLSQSTHRDINDSHNSNIYLSQASSNEFTQCHILVVAAGALIALFA---FLVSSLVNCGYLLERLR--NPRKIVRTCKIQEGSYSSLKQPIREDHFV----- 101
Po RVB MF966606 1 MGNRQSSLSQSTHRDINDSHNSNIYLSQASSNEFTQCHILVVAAGALIALFA---FLVSSLVNCGYLLERLR--NPRKIVRTCKIQEGSYSSLKQPIREDHFV----- 101
Po RVB MF966605 1 MGNRQSSLSQSTHRDINDSHNSNIYLSQASSNEFTQCHILVVAAGALIALFA---FLVSSLVNCGYLLERLR--NPRKIVRTCKIQEGSYSSLKQPIREDHFV----- 101
Po RVB MF966604 1 MGNRQSSLSQSTHRDINDSHNSNIYLSQASSNEFTQCHILVVAAGALIALFA---FLVSSLVNCGYLLERLR--NPRKIVRTCKIQEGSYSSLKQPIREDHFV----- 101
Po RVB MF966603 1 MGNRQSSLSQSTHRDINDSHNSNIYLSQASSNEFTQCHILVVAAGALIALFA---FLVSSLVNCGYLLERLR--NPRKIVRTCKIQEGSYSSLKQPIREDHFV----- 101
Po RVB MF966602 1 MGNRQSSLSQSTHRDINDSHNSNIYLSQASSNEFTQCHILVVAAGALIALFA---FLVSSLVNCGYLLERLR--NPRKIVRTCKIQEGSYSSLKQPIREDHFV----- 101
Po RVB MF966601 1 MGNRQSSLSQSTHRDINDSHNSNIYLSQASSNEFTQCHILVVAAGALIALFA---FLVSSLVNCGYLLERLR--NPRKIVRTCKIQEGSYSSLKQPIREDHFV----- 101
Po RVB MF966600 1 MGNRQSSLSQSTHRDINDSHNSNIYLSQASSNEFTQCHILVVAAGALIALFA---FLVSSLVNCGYLLERLR--NPRKIVRTCKIQEGSYSSLKQPIREDHFV----- 101
Po RVB MF966599 1 MGNRQSSLSQSTHRDINDSHNSNIYLSQASSNEFTQCHILVVAAGALIALFA---FLVSSLVNCGYLLERLR--NPRKIVRTCKIQEGSYSSLKQPIREDHFV----- 101
Po RVB MF966598 1 MGNRQSSLSQSTHRDINDSHNSNIYLSQASSNEFTQCHILVVAAGALIALFA---FLVSSLVNCGYLLERLR--NPRKIVRTCKIQEGSYSSLKQPIREDHFV----- 101
Po RVB MF966597 1 MGNRQSSLSQSTHRDINDSHNSNIYLSQASSNEFTQCHILVVAAGALIALFA---FLVSSLVNCGYLLERLR--NPRKIVRTCKIQEGSYSSLKQPIREDHFV----- 101
Cp RVB MF966596 1 MGSSDSSLSQSVHSHNHSQSSIHLOGTSTANTTQCHILVVAAGALIALFA---SLVPSICVNCYCYLCKRLKRTNGVSSLLERNLRONGSA---KIVYKRVMSQSTIIIE-----A 107
Cp RVB KY689691 1 MGSSDSSLSQSVHSHNHSQSSIHLOGTSTANTTQCHILVVAAGALIALFA---SLVPSICVNCYCYLCKRLKRTNGVSSLLERNLRONGSA---KIVYKRVMSQSTIIIE-----A 107
Hu RVB NC 021546 1 MGNRQSSAQLNSHLHINSQNSLPISDSKTAVHTQCHILVVAAGALIALFA---LVCSCVNLNCGYLLERLR--NPRKIVRTCKIQEGSYSSLKQPIREDHFV-----A 107
Hu RVB AY238391 1 MGNRQSSAQLNSHLHINSQNSLPISDSKTAVHTQCHILVVAAGALIALFA---LVCSCVNLNCGYLLERLR--NPRKIVRTCKIQEGSYSSLKQPIREDHFV-----A 107
Hu RVB GU391307 1 MGNRQSSAQLNSHLHINSQNSLPISDSKTAVHTQCHILVVAAGALIALFA---LVCSCVNLNCGYLLERLR--NPRKIVRTCKIQEGSYSSLKQPIREDHFV-----A 107
Hu RVB JQ904232 1 MGNRQSSAQLNSHLHINSQNSLPISDSKTAVHTQCHILVVAAGALIALFA---LVCSCVNLNCGYLLERLR--NPRKIVRTCKIQEGSYSSLKQPIREDHFV-----A 107
Hu RVB GU377230 1 MGNRQSSAQLNSHLHINSQNSLPISDSKTAVHTQCHILVVAAGALIALFA---LVCSCVNLNCGYLLERLR--NPRKIVRTCKIQEGSYSSLKQPIREDHFV-----A 107
Hu RVB GU377219 1 MGNRQSSAQLNSHLHINSQNSLPISDSKTAVHTQCHILVVAAGALIALFA---LVCSCVNLNCGYLLERLR--NPRKIVRTCKIQEGSYSSLKQPIREDHFV-----A 107
Hu RVB JQ904231 1 MGNRQSSAQLNSHLHINSQNSLPISDSKTAVHTQCHILVVAAGALIALFA---LVCSCVNLNCGYLLERLR--NPRKIVRTCKIQEGSYSSLKQPIREDHFV-----A 107
Hu RVB JQ904233 1 MGNRQSSAQLNSHLHINSQNSLPISDSKTAVHTQCHILVVAAGALIALFA---LVCSCVNLNCGYLLERLR--NPRKIVRTCKIQEGSYSSLKQPIREDHFV-----A 107
Hu RVB JQ904234 1 MGNRQSSAQLNSHLHINSQNSLPISDSKTAVHTQCHILVVAAGALIALFA---LVCSCVNLNCGYLLERLR--NPRKIVRTCKIQEGSYSSLKQPIREDHFV-----A 107
Hu RVB JQ904235 1 MGNRQSSAQLNSHLHINSQNSLPISDSKTAVHTQCHILVVAAGALIALFA---LVCSCVNLNCGYLLERLR--NPRKIVRTCKIQEGSYSSLKQPIREDHFV-----A 107
Hu RVB JQ904236 1 MGNRQSSAQLNSHLHINSQNSLPISDSKTAVHTQCHILVVAAGALIALFA---LVCSCVNLNCGYLLERLR--NPRKIVRTCKIQEGSYSSLKQPIREDHFV-----A 107
Hu RVB JQ904237 1 MGNRQSSAQLNSHLHINSQNSLPISDSKTAVHTQCHILVVAAGALIALFA---LVCSCVNLNCGYLLERLR--NPRKIVRTCKIQEGSYSSLKQPIREDHFV-----A 107
Hu RVB JQ904238 1 MGNRQSSAQLNSHLHINSQNSLPISDSKTAVHTQCHILVVAAGALIALFA---LVCSCVNLNCGYLLERLR--NPRKIVRTCKIQEGSYSSLKQPIREDHFV-----A 107
Hu RVB JQ904239 1 MGNRQSSAQLNSHLHINSQNSLPISDSKTAVHTQCHILVVAAGALIALFA---LVCSCVNLNCGYLLERLR--NPRKIVRTCKIQEGSYSSLKQPIREDHFV-----A 107
Hu RVB GU370057 1 MGNRQSSAQLNSHLHINSQNSLPISDSKTAVHTQCHILVVAAGALIALFA---LVCSCVNLNCGYLLERLR--NPRKIVRTCKIQEGSYSSLKQPIREDHFV-----A 107
Hu RVB JQ904229 1 MGNRQSSAQLNSHLHINSQNSLPISDSKTAVHTQCHILVVAAGALIALFA---LVCSCVNLNCGYLLERLR--NPRKIVRTCKIQEGSYSSLKQPIREDHFV-----A 107
Hu RVB JQ904228 1 MGNRQSSAQLNSHLHINSQNSLPISDSKTAVHTQCHILVVAAGALIALFA---LVCSCVNLNCGYLLERLR--NPRKIVRTCKIQEGSYSSLKQPIREDHFV-----A 107
Hu RVB JQ904225 1 MGNRQSSAQLNSHLHINSQNSLPISDSKTAVHTQCHILVVAAGALIALFA---LVCSCVNLNCGYLLERLR--NPRKIVRTCKIQEGSYSSLKQPIREDHFV-----A 107
Hu RVB JQ904236 1 MGNRQSSAQLNSHLHINSQNSLPISDSKTAVHTQCHILVVAAGALIALFA---LVCSCVNLNCGYLLERLR--NPRKIVRTCKIQEGSYSSLKQPIREDHFV-----A 107
Hu RVB JQ904235 1 MGNRQSSAQLNSHLHINSQNSLPISDSKTAVHTQCHILVVAAGALIALFA---LVCSCVNLNCGYLLERLR--NPRKIVRTCKIQEGSYSSLKQPIREDHFV-----A 107
Hu RVB JQ904234 1 MGNRQSSAQLNSHLHINSQNSLPISDSKTAVHTQCHILVVAAGALIALFA---LVCSCVNLNCGYLLERLR--NPRKIVRTCKIQEGSYSSLKQPIREDHFV-----A 107
Hu RVB JQ904227 1 MGNRQSSAQLNSHLHINSQNSLPISDSKTAVHTQCHILVVAAGALIALFA---LVCSCVNLNCGYLLERLR--NPRKIVRTCKIQEGSYSSLKQPIREDHFV-----A 107
Hu RVB JQ904226 1 MGNRQSSAQLNSHLHINSQNSLPISDSKTAVHTQCHILVVAAGALIALFA---LVCSCVNLNCGYLLERLR--NPRKIVRTCKIQEGSYSSLKQPIREDHFV-----A 107
Po RVB KX362373 1 MGNRQSSAQLNSHLHINSQNSLPISDSKTAVHTQCHILVVAAGALIALFA---LVCSCVNLNCGYLLERLR--NPRKIVRTCKIQEGSYSSLKQPIREDHFV-----A 107
Ga RVG MF120218 1 MGSNINNVQINQQNHILQASDQSKLNLDQKTTLSLESTQLLGI GAIVVVAIIII---LIFSLILNCGYLLERLR--NPRKIVRTCKIQEGSYSSLKQPIREDHFV-----V 106
Ga RVG KY689680 1 MGSNINNVQINQQNHILQASDQSKLNLDQKTTLSLESTQLLGI GAIVVVAIIII---LIFSLILNCGYLLERLR--NPRKIVRTCKIQEGSYSSLKQPIREDHFV-----V 106
Ga RVG NC 021583 1 MGSNINNVQINQQNHILQASDQSKLNLDQKTTLSLESTQLLGI GAIVVVAIIII---LIFSLILNCGYLLERLR--NPRKIVRTCKIQEGSYSSLKQPIREDHFV-----V 106
Ga RVG JQ920008 1 MGSNINNVQINQQNHILQASDQSKLNLDQKTTLSLESTQLLGI GAIVVVAIIII---LIFSLILNCGYLLERLR--NPRKIVRTCKIQEGSYSSLKQPIREDHFV-----V 106
Av RVG MF768259 1 MGSNINNVQINQQNHILQASDQSKLNLDQKTTLSLESTQLLGI GAIVVVAIIII---LIFSLILNCGYLLERLR--NPRKIVRTCKIQEGSYSSLKQPIREDHFV-----V 104
Av RVG KC876005 1 MGSNINNVQINQQNHILQASDQSKLNLDQKTTLSLESTQLLGI GAIVVVAIIII---LIFSLILNCGYLLERLR--NPRKIVRTCKIQEGSYSSLKQPIREDHFV-----V 104
Ca RVI NC 026820 1 MGSNINNVQINQQNHILQASDQSKLNLDQKTTLSLESTQLLGI GAIVVVAIIII---LIFSLILNCGYLLERLR--NPRKIVRTCKIQEGSYSSLKQPIREDHFV-----V 79
Ca RVI KM369898 1 MGSNINNVQINQQNHILQASDQSKLNLDQKTTLSLESTQLLGI GAIVVVAIIII---LIFSLILNCGYLLERLR--NPRKIVRTCKIQEGSYSSLKQPIREDHFV-----V 79
Ca RVI KM369887 1 MGSNINNVQINQQNHILQASDQSKLNLDQKTTLSLESTQLLGI GAIVVVAIIII---LIFSLILNCGYLLERLR--NPRKIVRTCKIQEGSYSSLKQPIREDHFV-----V 79
Fe RVI KY026790 1 MGSNINNVQINQQNHILQASDQSKLNLDQKTTLSLESTQLLGI GAIVVVAIIII---LIFSLILNCGYLLERLR--NPRKIVRTCKIQEGSYSSLKQPIREDHFV-----V 80
```

890

891 **Figure S1.** Alignment of complete RVB, RVG, and RVI NSP1-1 sequences, colored  
892 based on amino acid identity, with darker purple indicating higher identity at a given  
893 position. RVB Bang117 NSP1-1 is shown in bold text. For each sequence, host origin,  
894 rotavirus species, and GenBank accession number are indicated. Av, avian; Ca, canine;  
895 Cp, caprine; Fe, feline; Ga, gallinaceous; Hu, human; Po, porcine.

896
